# Supplementary material
Source: PubMed Central journal article supplement (PMC8360047)
Supplement: ehp8795.s001.acco.pdf [file ehp8795.s001.acco.pdf]

**Note to readers with disabilities:** *EHP* strives to ensure that all journal content is accessible to all readers. However, some figures and Supplemental Material published in *EHP* articles may not conform to [508 standards](#) due to the complexity of the information being presented. If you need assistance accessing journal content, please contact [ehp508@niehs.nih.gov](mailto:ehp508@niehs.nih.gov). Our staff will work with you to assess and meet your accessibility needs within 3 working days.

### **Supplemental Material**

#### **Multi- and Transgenerational Outcomes of an Exposure to a Mixture of Endocrine-Disrupting Chemicals (EDCs) on Puberty and Maternal Behavior in the Female Rat**

David López-Rodríguez, Carlos Francisco Aylwin, Virginia Delli, Elena Sevrin, Marzia Campanile, Marion Martin, Delphine Franssen, Arlette Gérard, Silvia Blacher, Ezio Tirelli, Agnès Noël, Alejandro Lomniczi, and Anne-Simone Parent

#### **Table of Contents**

**Figure S1.** Body weight and ovarian weight measured at P60 in F1 (n=14/group), F2 (n=16/group) and F3 (n=9-10/group) females. Measurements are displayed in grams. Bars represent mean  $\pm$ s.e.m. (\*P < 0.05, \*\*\*P < 0.001 vs. CTL, Student's t-test). Summary data are reported in Table S5.

**Figure S2.** Fold enrichment of gene ontology (GO) annotations using David pathway analysis across compared groups (CTL vs EDC) in the MBH-PoA of F3 generation females at P21. The gene enrichment analysis grouped the differentially expressed genes using GO annotations data. We selected enriched GO annotations using 2-fold enrichment criteria as a threshold and identifying annotations that were involved in brain and behavioral processes. Those annotations were then categorized in upregulated (orange) or downregulated (blue) annotations.

**Figure S3.** *Nr3c1*, *Crh*, *Grin2d*, *Grid2* and *Avp* mRNA expression in the female rat ancestrally (F3 generation) exposed to an EDC mixture or vehicle in the MBH-PoA of infant (P6), prepubertal (P1) and adult (P60) female rats as determined by qPCR (n=6/group). AU = arbitrary units. RNA expression data were normalized by dividing each individual value by the average of the control group at every time point. Bars represent mean  $\pm$  s.e.m. (\*P < 0.05, \*\*P < 0.01, \*\*\*P < 0.001 vs. CTL, Student's t-test). Summary data are reported in Table S5.

**Figure S4.** Abundance of the TrxG-dependent activating marks H3K4me3 and H3K9ac and the PcG-dependent repressive mark H3K27me3 and H3K9me3 at the *Kiss1*, *Esr1*, *Oxt*, *Pomc*, *Cart*, *Nr3c1*, *Crh* and *Grin2d* promoter in the prepubertal MBH-PoA of females EDC and control from the F3 generation, as measured by ChIP (n=6/group). Dotted red lines represent repressive histone modifications while green lines represent activatory histone modifications. All data was normalized to control. Bars represent mean  $\pm$  s.e.m. (\*P < 0.05, \*\*P < 0.01, \*\*\*P < 0.001 vs. CTL, Student's t-test). Summary data are reported in Table S5.

**Figure S5.** Maternal behavior displayed by F0 female rats directly exposed to a mixture of EDC or vehicle. Data shows time spent by dams displaying in-nest behavior (nest building, Arched-back, blancked and passive nursing; and total time spent in-nest) or off-nest behaviors (eating/drinking, self-grooming, being active and total time off-nest) from P2 to P8. Plotted lines represent average of time  $\pm$  s.e.m. Summary data are reported in Table S5.

**Figure S6.** Maternal behavior displayed by F1 female rats exposed *in utero* to a mixture of EDC or vehicle. Data shows time spent by dams displaying in-nest behavior (nest building, Arched-back, blancked and passive nursing; and total time spent in-nest) or off-nest behaviors (eating/drinking, self-grooming, being active and total time off-nest) from P2 to P8. Plotted lines represent average of time  $\pm$  s.e.m. Summary data are reported in Table S5.

**Figure S7.** Maternal behavior displayed by F2 female rats exposed as germ cells to a mixture of EDC or vehicle. Data shows time spent by dams displaying in-nest behavior (nest building, Arched-back, blancked and passive nursing; and total time spent in-nest) or off-nest behaviors (eating/drinking, self-grooming, being active and total time off-nest) from P2 to P8. Plotted lines represent average of time  $\pm$  s.e.m. Summary data are reported in Table S5.

**Figure S8.** Maternal behavior displayed by F3 female rats directly ancestrally exposed to a mixture of EDC or vehicle. Data shows time spent by dams displaying in-nest behavior (nest building, Arched-back, blancked and passive nursing; and total time spent in-nest) or off-nest behaviors (eating/drinking, self-grooming, being active and total time off-nest) from P2 to P8. Plotted lines represent average of time  $\pm$  s.e.m. Summary data are reported in Table S5.

**Figure S9.** Fold enrichment of gene ontology (GO) annotations using David pathway analysis across compared groups (CTL vs EDC) in the MBH-PoA of F1 generation females at P21. The gene enrichment analysis grouped the differentially expressed genes using GO annotations data. We selected enriched GO annotations using 2-fold enrichment criteria as a threshold and identifying annotations that were involved in brain and behavioral processes. Those annotations were then categorized in upregulated (orange) or downregulated (blue) annotations.

**Figure S10.** *Nr3c1* and *Crh* mRNA expression and *Darpp32* and *Drd1* promoter chromatin state in the female rat *in utero* and lactationally (F1 generation) exposed to an EDC mixture or vehicle. (a) Expression of *Nr3c1* and *Crh* mRNA in the MBH-PoA prepubertal (P21) female rats as determined by qPCR (n=6/group). AU = arbitrary units. RNA expression data were normalized by dividing each individual value by the average of the control group at every time point. (b-c) Abundance of the TrxG-dependent activating marks H3K4me3 and H3K9ac and the PcG-dependent repressive mark H3K27me3 and H3K9me3 at the *Darpp32* and *Drd1* promoter in the prepubertal MBH-PoA of females perinatally exposed to a mixture of EDC (F1 generation), as measured by ChIP (n=6/group). Dotted red lines represent repressive histone modifications while green lines represent activatory histone modifications. Bars represent mean  $\pm$  s.e.m. Summary data are reported in Table S5.

**Figure S11.** Abundance of the TrxG-dependent activating marks H3K4me3 (a) and H3K9ac (b) and the PcG-dependent repressive mark H3K27me3 (c) at the *Kiss1*, *Esr1*, *Oxt* and *Th* promoter in the prepubertal (P21) MBH-PoA of the transgenerationally-exposed EDC pups or control raised by either *in utero* EDC exposed dams or control, as measured by ChIP (n=6/group). CC= control pup raised by control dam; EC: control pup raised by *in utero* EDC exposed dam; EE= germ-cell EDC exposed pup raised by *in utero* EDC exposed dam; CE= germ-cell EDC exposed pup raised by control dam. Bars represent mean  $\pm$  s.e.m. (\*P < 0.05, \*\*P < 0.01 vs. CC, †P < 0.05 vs. CE, one-way ANOVA). Summary data are reported in Table S6.

**Table S1.** Primer Sequence.

**Table S2.** List of primary antibodies.

**Table S3.** Report of descriptive and statistical data.

**Table S4.** Report of descriptive data and statistical analysis of crossfostering data.

**Table S5.** Report of descriptive and statistical data from supplementary material.

**Table S6.** Report of descriptive data and statistical analysis of crossfostering data from the supplementary material.

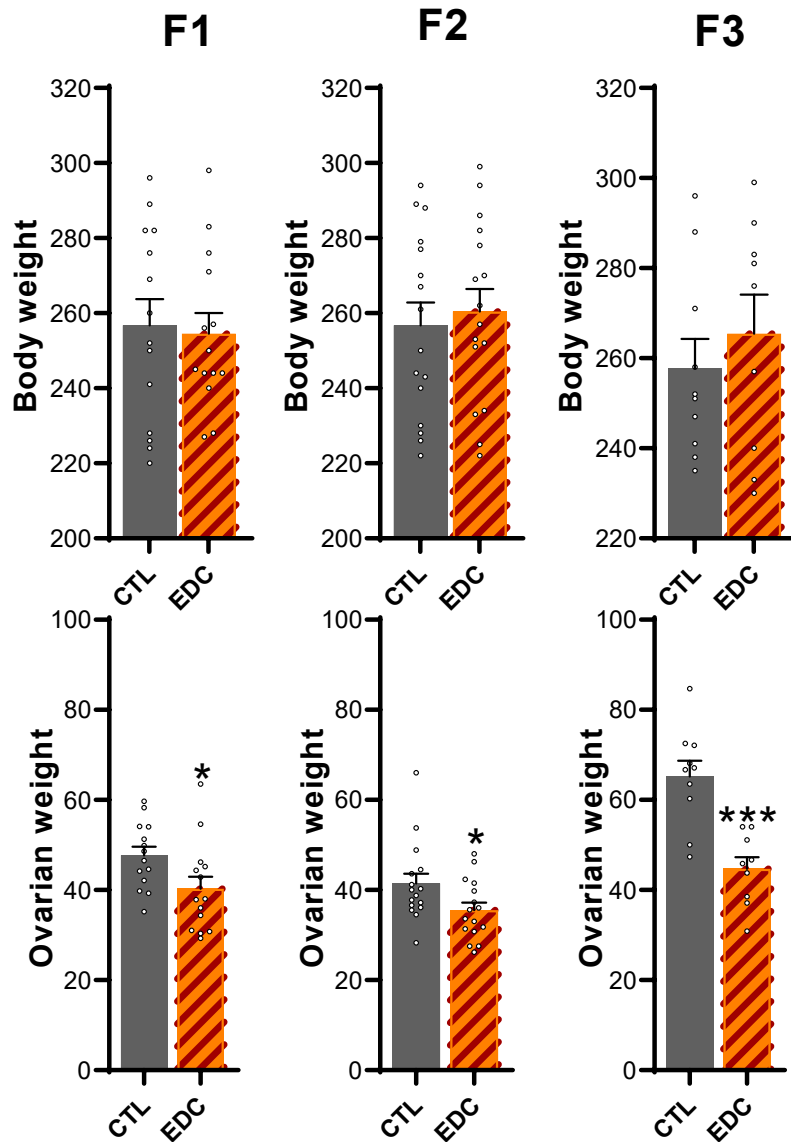

**Figure S1.** Body weight and ovarian weight measured at P60 in F1 (n=14/group), F2 (n=16/group) and F3 (n=9-10/group) females. Measurements are displayed in grams. Bars represent mean  $\pm$ s.e.m. (\* $P < 0.05$ , \*\*\* $P < 0.001$  vs. CTL, Student's t-test). Summary data are reported in Table S5.

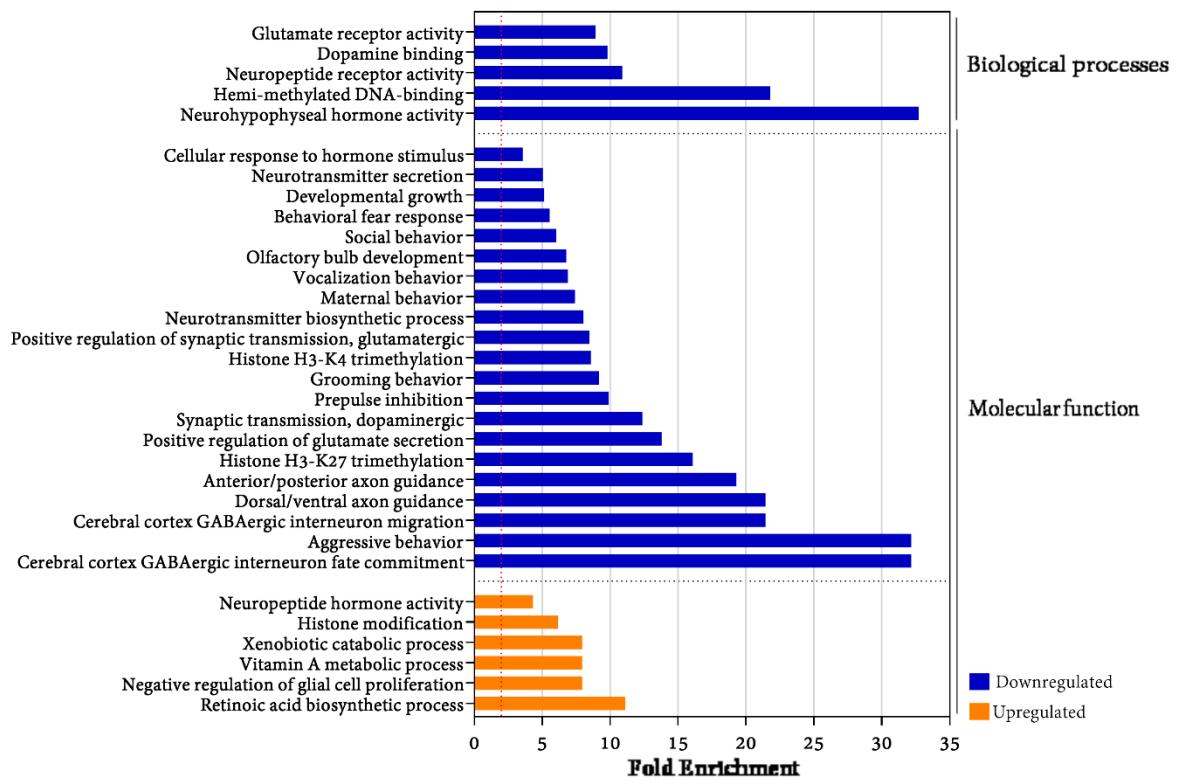

**Figure S2.** Fold enrichment of gene ontology (GO) annotations using David pathway analysis across compared groups (CTL vs EDC) in the MBH-PoA of F3 generation females at P21. The gene enrichment analysis grouped the differentially expressed genes using GO annotations data. We selected enriched GO annotations using 2-fold enrichment criteria as a threshold and identifying annotations that were involved in brain and behavioral processes. Those annotations were then categorized in upregulated (orange) or downregulated (blue) annotations.

### F3 MBH mRNA validation

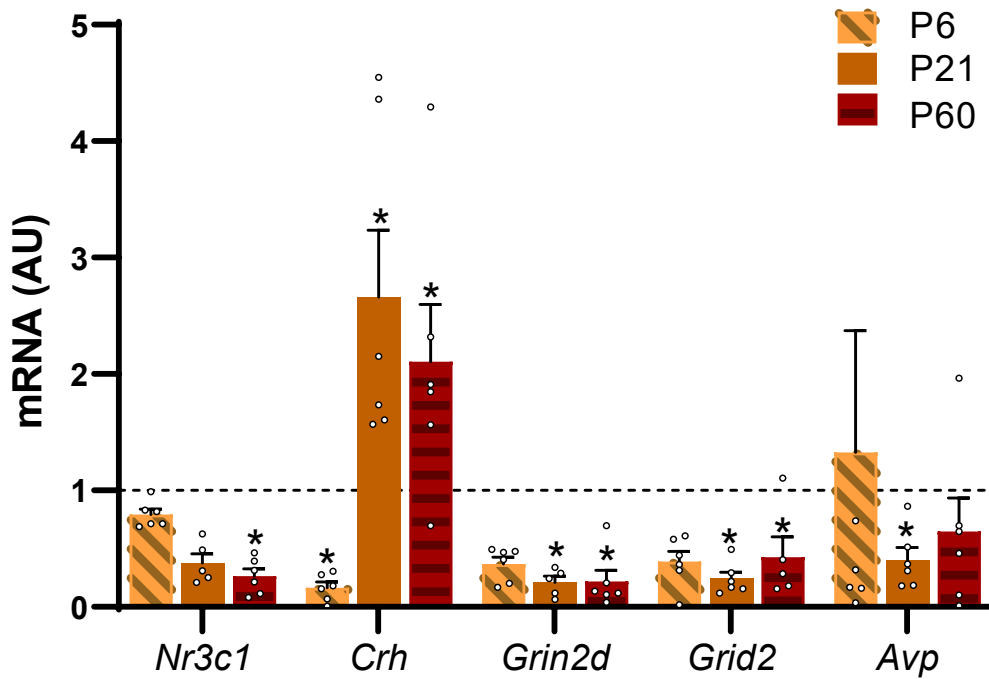

**Figure S3.** *Nr3c1*, *Crh*, *Grin2d*, *Grid2* and *Avp* mRNA expression in the female rat ancestrally (F3 generation) exposed to an EDC mixture or vehicle in the MBH-PoA of infant (P6), prepubertal (P1) and adult (P60) female rats as determined by qPCR (n=6/group). AU = arbitrary units. RNA expression data were normalized by dividing each individual value by the average of the control group at every time point. Bars represent mean  $\pm$  s.e.m. (\*P < 0.05, \*\*P < 0.01, \*\*\*P < 0.001 vs. CTL, Student's t-test). Summary data are reported in Table S5

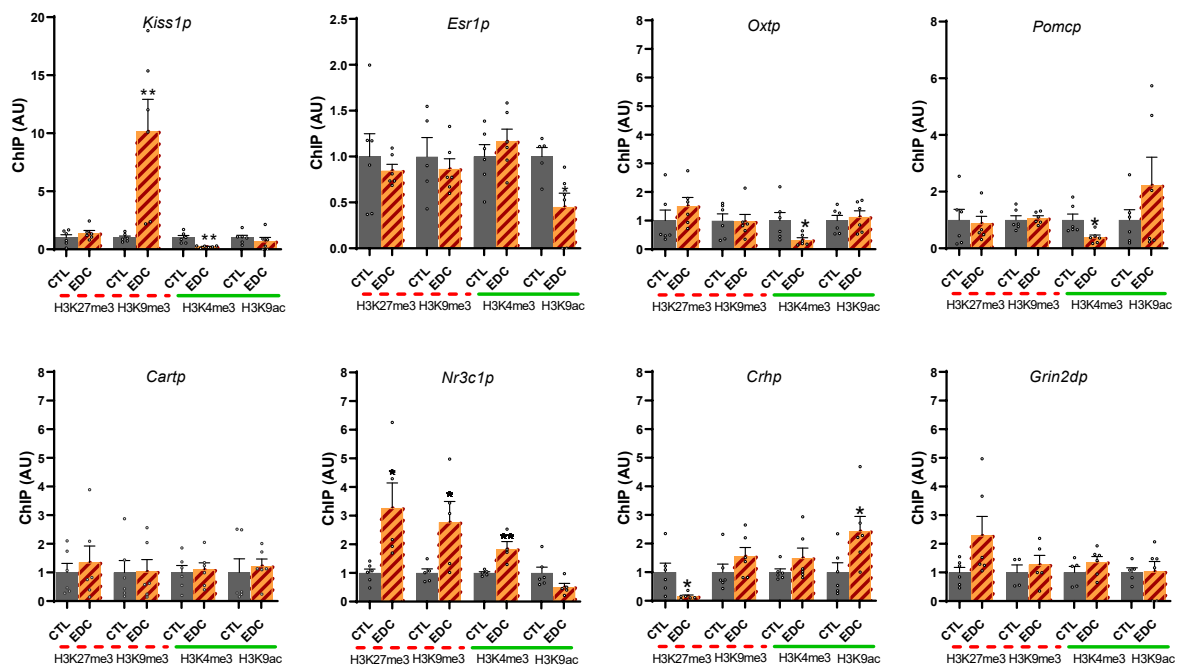

**Figure S4.** Abundance of the TrxG-dependent activating marks H3K4me3 and H3K9ac and the PcG-dependent repressive mark H3K27me3 and H3K9me3 at the *Kiss1*, *Esr1*, *Oxt*, *Pomcp*, *Cart*, *Nr3c1*, *Crhp* and *Grin2dp* promoter in the prepubertal MBH-PoA of females EDC and control from the F3 generation, as measured by ChIP (n=6/group). Dotted red lines represent repressive histone modifications while green lines represent activating histone modifications. All data was normalized to control. Bars represent mean  $\pm$  s.e.m. (\* $P < 0.05$ , \*\* $P < 0.01$ , \*\*\* $P < 0.001$  vs. CTL, Student's t-test). Summary data are reported in Table S5

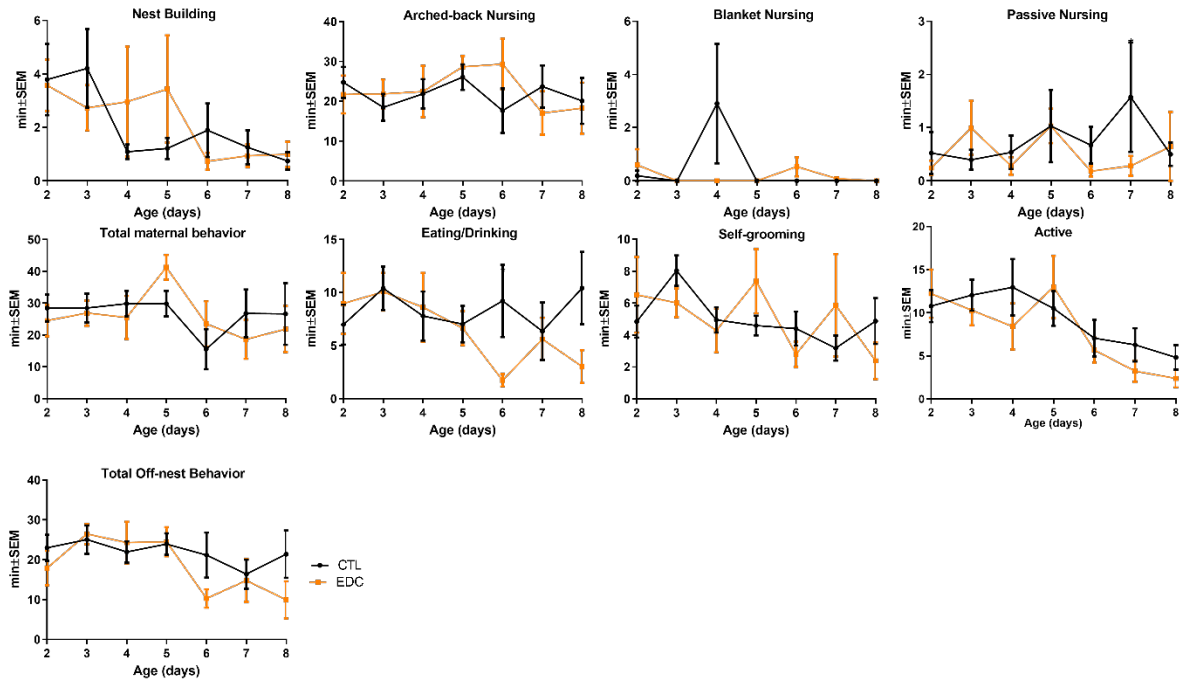

**Figure S5.** Maternal behavior displayed by F0 female rats directly exposed to a mixture of EDC or vehicle. Data shows time spent by dams displaying in-nest behavior (nest building, Arched-back, blanketed and passive nursing; and total time spent in-nest) or off-nest behaviors (eating/drinking, self-grooming, being active and total time off-nest) from P2 to P8. Plotted lines represent average of time  $\pm$  s.e.m. Summary data are reported in Table S5



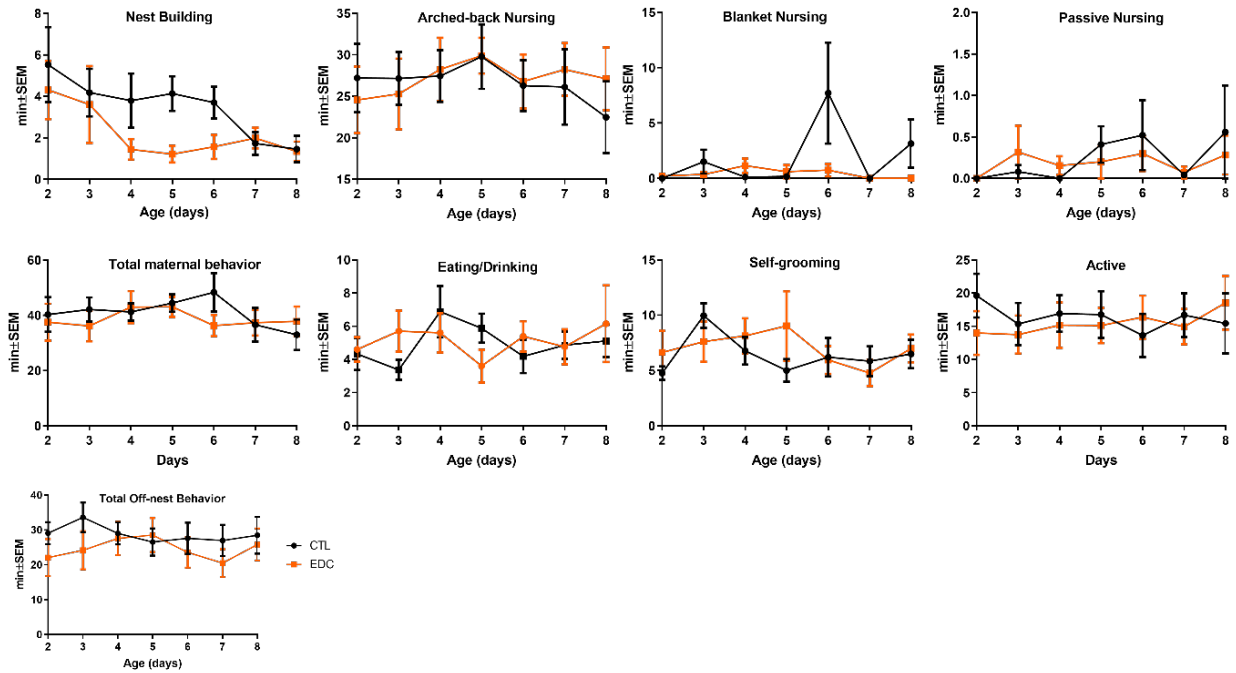

**Figure S6.** Maternal behavior displayed by F1 female rats exposed *in utero* to a mixture of EDC or vehicle. Data shows time spent by dams displaying in-nest behavior (nest building, Arched-back, blanketed and passive nursing; and total time spent in-nest) or off-nest behaviors (eating/drinking, self-grooming, being active and total time off-nest) from P2 to P8. Plotted lines represent average of time  $\pm$  s.e.m. Summary data are reported in Table S5

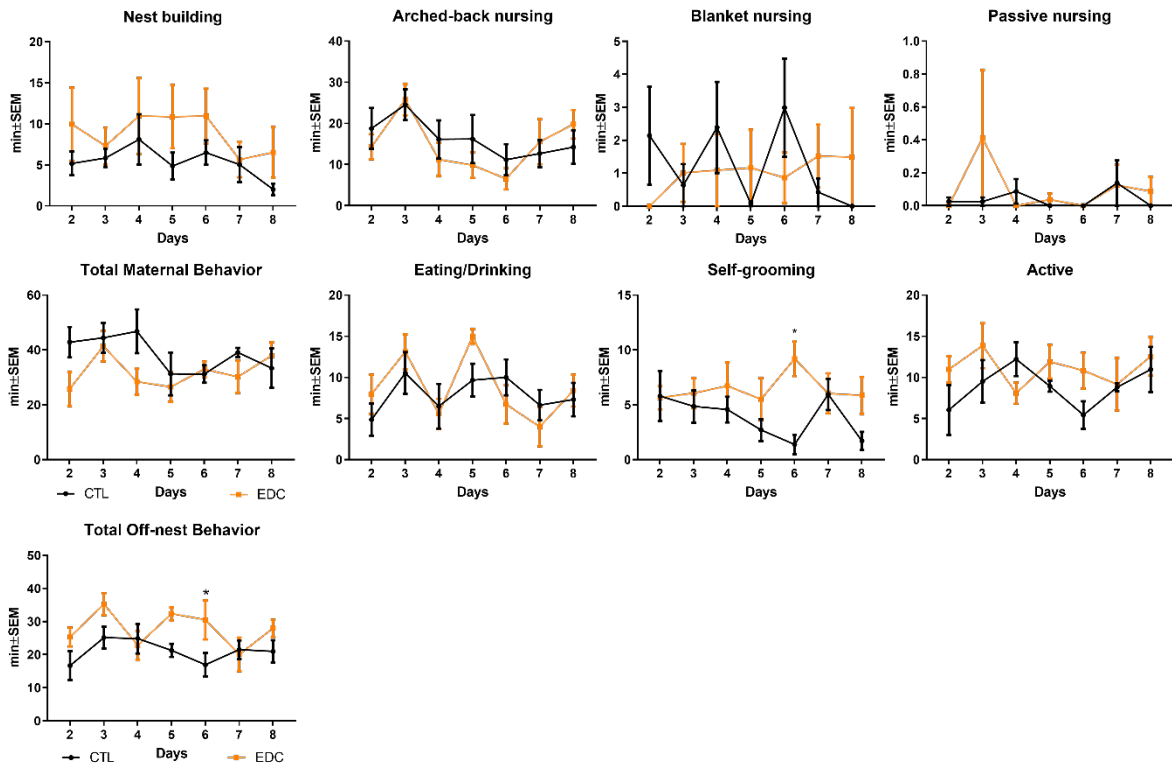

**Figure S7.** Maternal behavior displayed by F2 female rats exposed as germ cells to a mixture of EDC or vehicle. Data shows time spent by dams displaying in-nest behavior (nest building, Arched-back, blanketed and passive nursing; and total time spent in-nest) or off-nest behaviors (eating/drinking, self-grooming, being active and total time off-nest) from P2 to P8. Plotted lines represent average of time  $\pm$  s.e.m. Summary data are reported in Table S5

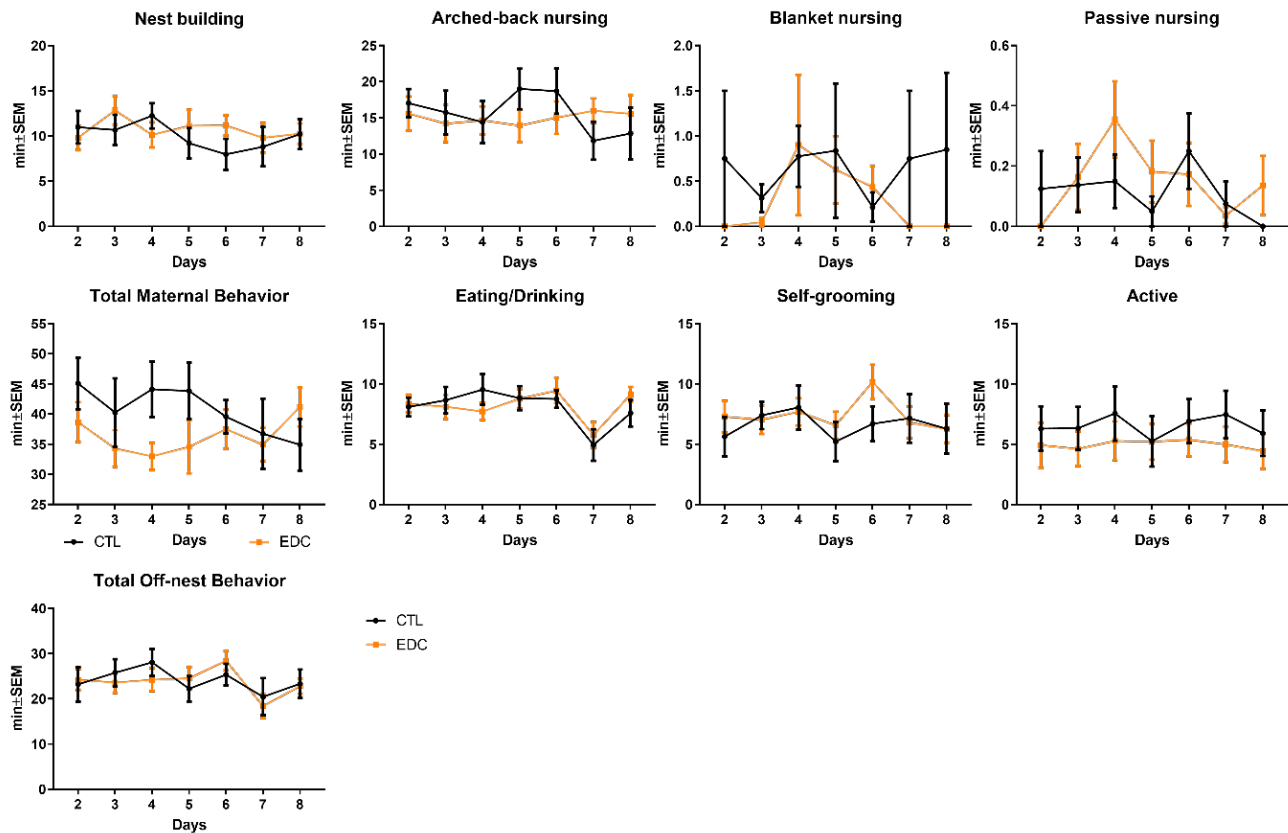

**Figure S8.** Maternal behavior displayed by F3 female rats directly ancestrally exposed to a mixture of EDC or vehicle. Data shows time spent by dams displaying in-nest behavior (nest building, Arched-back, blanketed and passive nursing; and total time spent in-nest) or off-nest behaviors (eating/drinking, self-grooming, being active and total time off-nest) from P2 to P8. Plotted lines represent average of time  $\pm$  s.e.m. Summary data are reported in Table S5

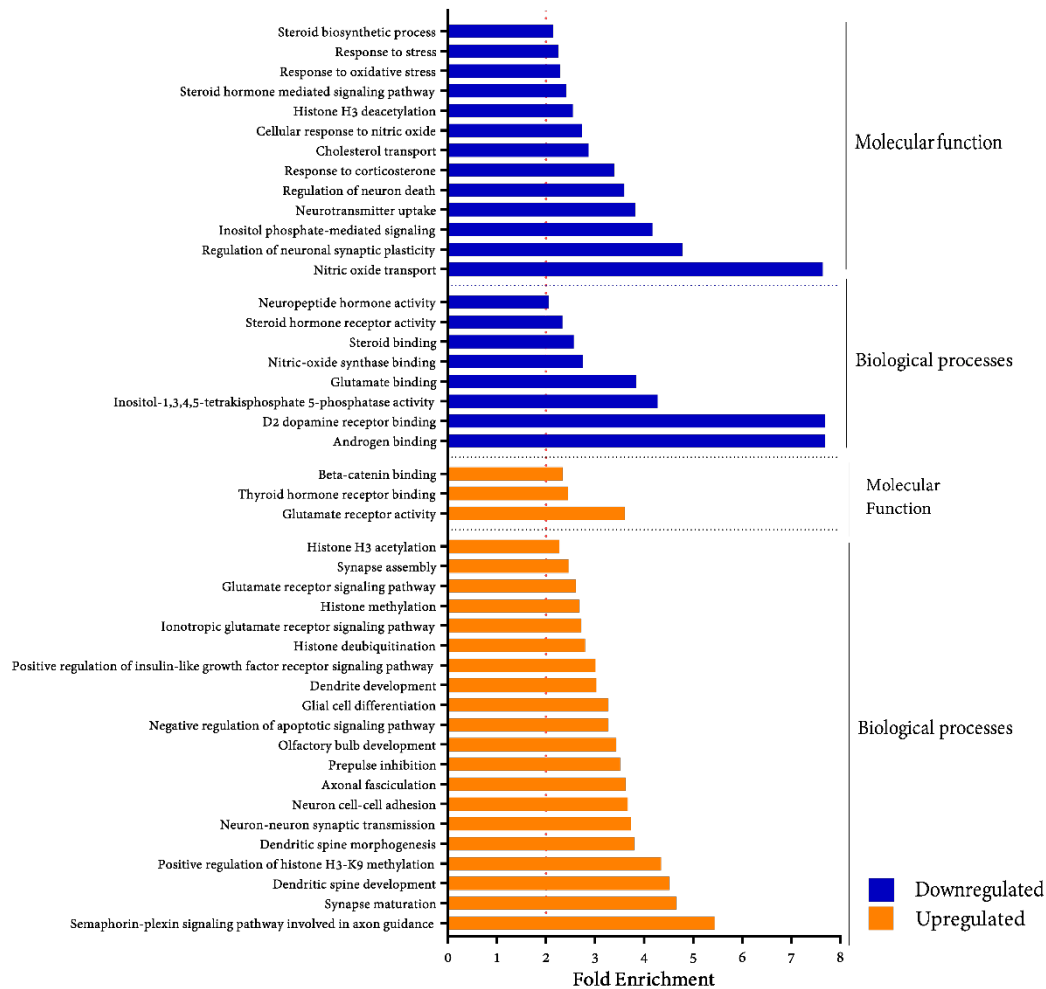

**Figure S9.** Fold enrichment of gene ontology (GO) annotations using David pathway analysis across compared groups (CTL vs EDC) in the MBH-PoA of F1 generation females at P21. The gene enrichment analysis grouped the differentially expressed genes using GO annotations data. We selected enriched GO annotations using 2-fold enrichment criteria as a threshold and identifying annotations that were involved in brain and behavioral processes. Those annotations were then categorized in upregulated (orange) or downregulated (blue) annotations.

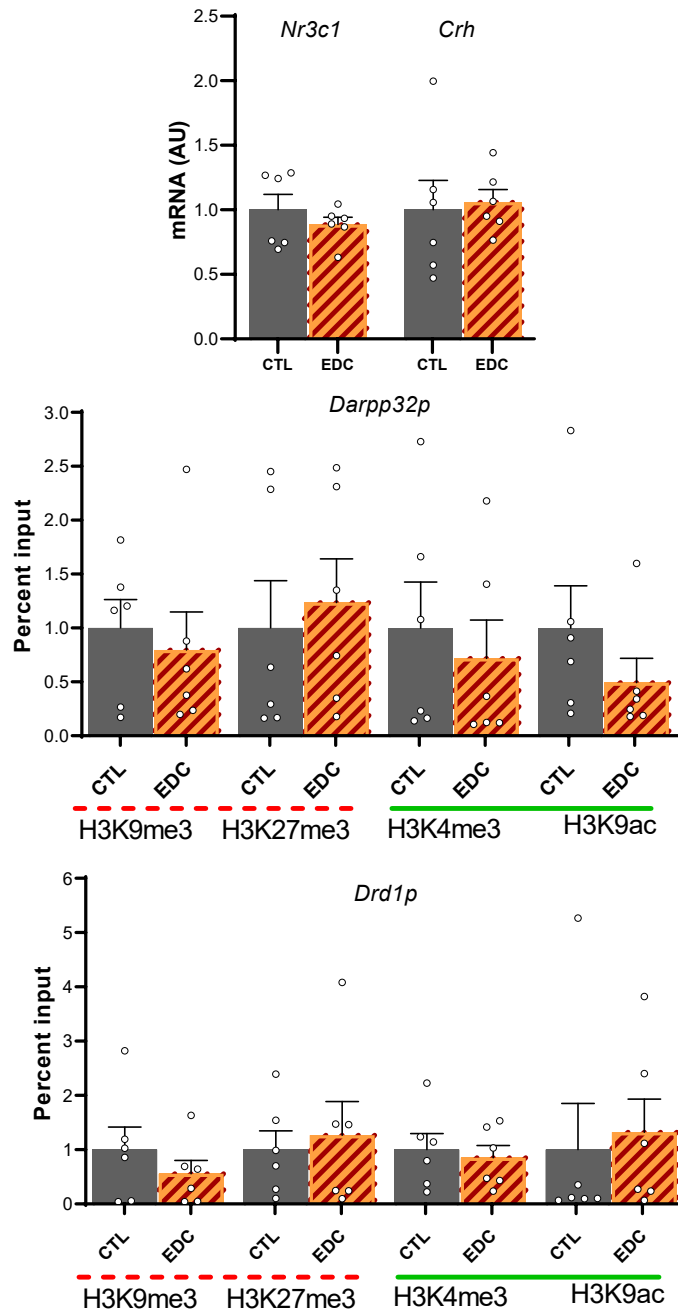

**Figure S10.** *Nr3c1* and *Crh* mRNA expression and *Darpp32* and *Dard1* promoter chromatin state in the female rat *in utero* and lactationally (F1 generation) exposed to an EDC mixture or vehicle. (a) Expression of *Nr3c1* and *Crh* mRNA in the MBH-PoA prepubertal (P21) female rats as determined by qPCR (n=6/group). AU = arbitrary units. RNA expression data were normalized by dividing each individual value by the average of the control group at every time point. (b-c) Abundance of the TrxG-dependent activating marks H3K4me3 and H3K9ac and the PcG-dependent repressive mark H3K27me3 and H3K9me3 at the *Darpp32* and *Drd1* promoter in the prepubertal MBH-PoA of females perinatally exposed to a mixture of EDC (F1 generation), as measured by ChIP (n=6/group). Dotted red lines represent repressive histone modifications while green lines represent activatory histone modifications. Bars represent mean  $\pm$  s.e.m. Summary data are reported in Table S5

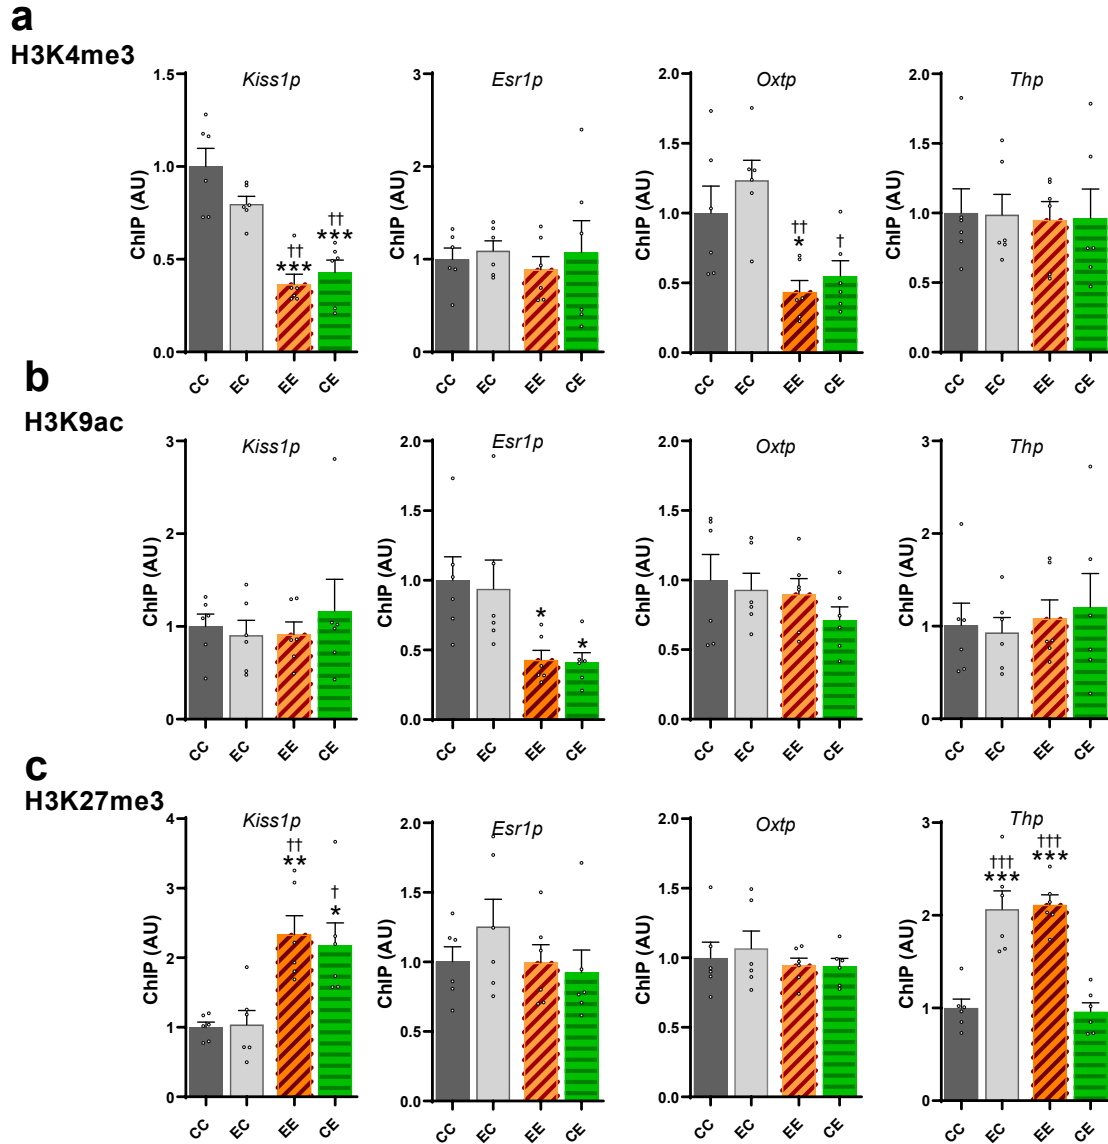

**Figure S11.** Abundance of the TrxG-dependent activating marks H3K4me3 (a) and H3K9ac (b) and the PcG-dependent repressive mark H3K27me3 (c) at the *Kiss1*, *Esr1*, *Oxt* and *Th* promoter in the prepubertal (P21) MBH-PoA of the transgenerationally-exposed EDC pups or control raised by either *in utero* EDC exposed dams or control, as measured by ChIP (n=6/group). CC= control pup raised by control dam; EC= control pup raised by *in utero* EDC exposed dam; EE= germ-cell EDC exposed pup raised by *in utero* EDC exposed dam; CE= germ-cell EDC exposed pup raised by control dam. Bars represent mean  $\pm$  s.e.m. (\*P < 0.05, \*\*P < 0.01 vs. CC, †P < 0.05 vs. CE, one-way ANOVA). Summary data are reported in Table S6

Table S1. Primer Sequence

| Gene           | Primer                                                                                                              | Accession number | Amplicon size | Use    |
|----------------|---------------------------------------------------------------------------------------------------------------------|------------------|---------------|--------|
| <i>Kiss1</i>   | F <i>TGGTGAACCCTGAACCCACAGGC</i>                                                                                    | NM_181692.1      | 136           | qPCR   |
|                | R <i>CGGCGGGCATGGCGATGTT</i>                                                                                        |                  |               |        |
| <i>Esr1</i>    | F <i>CGCTCTGCCTTGATCACACA</i>                                                                                       | NM_012689.1      | 188           | qPCR   |
|                | R <i>GCCGAGGTACAGATTGGCTT</i>                                                                                       |                  |               |        |
| <i>Oxt</i>     | F <i>GCTGCCAGGAGGAGAACTAC</i>                                                                                       | NM_012996.3      | 175           | qPCR   |
|                | R <i>ATCATCACAAAGCGGGCTCA</i>                                                                                       |                  |               |        |
| <i>Pomc</i>    | F <i>CTTTCCGCGACAGAGCCT</i>                                                                                         | NM_139326.2      | 113           | qPCR   |
|                | R <i>CCAGCTCCACACGTCTATGG</i>                                                                                       |                  |               |        |
| <i>Th</i>      | F <i>CCTTCCAGTACAAGCACGGT</i>                                                                                       | NM_012740.3      | 109           | qPCR   |
|                | R <i>TGGGTAGCATAGAGGCCCTT</i>                                                                                       |                  |               |        |
| <i>Cart</i>    | F <i>GCGCTGTGTTGCAGATTGAA</i>                                                                                       | NM_017110.1      | 105           | qPCR   |
|                | R <i>CGTCACACATGGGGACTTGG</i>                                                                                       |                  |               |        |
| <i>Nr3c1</i>   | F <i>GGTGATTGAACCCGAGGTGT</i>                                                                                       | NM_012576.2      | 147           | qPCRR  |
|                | R <i>TTTCTGAAGCCTGGTATCGCC</i>                                                                                      |                  |               |        |
| <i>Crh</i>     | F <i>CAAGGGAGGAGAAGAGAGCG</i>                                                                                       | NM_031019.1      | 160           | qPCR   |
|                | R <i>AAGAAATTCACGGCTGCGG</i>                                                                                        |                  |               |        |
| <i>Grin2d</i>  | F <i>AGCTCTGCGACCTGCTGT</i>                                                                                         | NM_022797.1      | 190           | qPCR   |
|                | R <i>CCAAGCTGCAGGAAGGTGGA</i>                                                                                       |                  |               |        |
| <i>Dnm1</i>    | F <i>TCTACAAGGATTACCGGCAGC</i>                                                                                      | NM_080689.4      | 121           | qPCR   |
|                | R <i>GCTTTCTCCTTGTCCTCCCAACA</i>                                                                                    |                  |               |        |
| <i>Drd1</i>    | F <i>CCACTCTCCTGGGCAATACC</i>                                                                                       | XM_006253600.3   | 180           | qPCR   |
|                | R <i>AAAAGGACCCAAAGGGCCAA</i>                                                                                       |                  |               |        |
| <i>Darpp32</i> | F <i>CCCAAGGACCGCAAGAAGAT</i>                                                                                       | NM_138521.1      | 172           | qPCR   |
|                | R <i>CTCCTGAGGTTCTCTGGTGC</i>                                                                                       |                  |               |        |
| <i>Grid2</i>   | F <i>GTCCCATCGAAAGAGGATGACA</i>                                                                                     | NM_024379.1      | 97            | qPCR   |
|                | R <i>ACTGTTTATGGGGGCTGTCTG</i>                                                                                      |                  |               |        |
| <i>Avp</i>     | F <i>AGCGATGAGAGCTGCGTG</i>                                                                                         | NM_016992.2      | 129           | qPCR   |
|                | R <i>CTGTACCAGCCTAAGCAGCA</i>                                                                                       |                  |               |        |
| <i>Kiss1</i>   | F <i>TCGGGCAGCCAGATAGAGGAAGC</i>                                                                                    | NM_181692.1      | 91            | ChIP   |
|                | R <i>TTGAGGGCCGAGGGAGAAGAG</i>                                                                                      |                  |               |        |
| <i>Esr1</i>    | F <i>GTCCCTCAGCAGCCAGCCAGTCT</i>                                                                                    | NM_012689.1      | 127           | ChIP   |
|                | R <i>CTCTCGGGAAGCAGCCAGTAGG</i>                                                                                     |                  |               |        |
| <i>Oxt</i>     | F <i>TGTAGCTTAGGCCTCCCCTT</i>                                                                                       | NM_012996.3      | 159           | ChIP   |
|                | R <i>CATGACTGGTCACAGCAGGT</i>                                                                                       |                  |               |        |
| <i>Pomc</i>    | F <i>GCTAAGCCTCTGTCCAGTCC</i>                                                                                       | NM_139326.2      | 103           | ChIP   |
|                | R <i>GTTAGCACAGACCCGCTGAA</i>                                                                                       |                  |               |        |
| <i>Th</i>      | F <i>CCGACTGGGGCAGTGAATAG</i>                                                                                       | NM_012740.3      | 198           | ChIP   |
|                | R <i>TAACCAAACCAGGGCACACA</i>                                                                                       |                  |               |        |
| <i>Cart</i>    | F <i>TTCCATTTTCATGGGCCCTCC</i>                                                                                      | NM_017110.1      | 139           | ChIP   |
|                | R <i>GGCTGGAGCACAGAGAACAA</i>                                                                                       |                  |               |        |
| <i>Nr3c1</i>   | F <i>AAGGGTTAGAAGGAATTTGGGGA</i>                                                                                    | NM_012576.2      | 180           | ChIP   |
|                | R <i>TGACGTGCCAGAGCCAATTA</i>                                                                                       |                  |               |        |
| <i>Crh</i>     | F <i>ACGCAATCGAGCTGTCAAGA</i>                                                                                       | NM_031019.1      | 96            | ChIP   |
|                | R <i>CAGAGCCCGGAGTGAGATTT</i>                                                                                       |                  |               |        |
| <i>Grin2d</i>  | F <i>TCTGGTTCTGTTCTGGGTTTTTG</i>                                                                                    | NM_022797.1      | 121           | ChIP   |
|                | R <i>TGGGGTCAGGGAAGATACAGAGGT</i>                                                                                   |                  |               |        |
| <i>Th – BS</i> | F <i>TCGTCGGCAGCGTCAGATGTGTATA</i>                                                                                  | NM_012740.3      | 302           | BS-seq |
|                | R <i>AGAGACAGGTTTTTTTTTAGGTATAGTAGG</i><br><i>GTCTCGTGGGCTCGGAGATGTGTATAA</i><br><i>GAGACAGTATTATTATAGGTACAAAAG</i> |                  |               |        |

Table S2. List of primary antibodies

| Target                | Host   | Source         | Catalog # | Use  |
|-----------------------|--------|----------------|-----------|------|
| Th                    | Mouse  | ImmunoStar     | 22941     | IHC  |
| H3K27me3              | Rabbit | Active Motif   | 39155     | ChIP |
| H3K9ac                | Rabbit | Active Motif   | 39917     | ChIP |
| H3K4me3               | Rabbit | Active Motif   | 39159     | ChIP |
| H3K9me3               | Mouse  | Active Motif   | 61013     | ChIP |
| $\beta$ -Galatocidase | Rabbit | Cortex Biochem | CR7001RP2 | ChIP |
| $\beta$ -Galatocidase | Mouse  | ICN Biomedical | 55976     | ChIP |



Table S3. Report of descriptive and statistical data.

| Measure (unit)                             | F  | N     | Average |       | SD    |       | p-value | Effect Size | Figure    |
|--------------------------------------------|----|-------|---------|-------|-------|-------|---------|-------------|-----------|
|                                            |    |       | CTL     | EDC   | CTL   | EDC   |         |             |           |
| Vaginal Opening (days)                     | F1 | 51/56 | 33.92   | 33.98 | 1.71  | 2.94  | 0.989   | 0.02        | 2a        |
|                                            | F2 | 50/52 | 34.73   | 37.93 | 1.33  | 1.58  | 0.000   | 2.19        | 2b        |
|                                            | F3 | 15/24 | 34.29   | 38.20 | 1.92  | 1.32  | 0.000   | 2.37        | 2c        |
|                                            | F4 | 47/64 | 31.36   | 34.50 | 1.36  | 1.40  | 0.000   | 2.27        | 2d        |
| GnRH IP (min)                              | F1 | 4     | 44.38   | 43.75 | 1.25  | 1.44  | 0.537   | 0.47        | 2a        |
|                                            | F3 |       | 42.03   | 44.06 | 0.94  | 1.08  | 0.030   | 2.01        | 2c        |
| Regular cycle (%)                          | F1 | 20    | 88.75   | 89.38 | 27.77 | 26.06 | 0.921   | 0.02        | 3a left   |
| Proestrus (%)                              |    |       | 23.93   | 23.31 | 4.06  | 5.18  | 0.679   | 0.13        |           |
| Estrus (%)                                 |    |       | 26.58   | 28.78 | 6.16  | 12.48 | 0.483   | 0.22        |           |
| Diestrus (%)                               |    |       | 49.49   | 47.91 | 5.70  | 8.47  | 0.674   | 0.22        |           |
| Regular cycle (%)                          | F2 | 15    | 89.17   | 60.83 | 24.49 | 42.75 | 0.034   | 0.81        | 3b left   |
| Proestrus (%)                              |    |       | 23.75   | 22.50 | 3.30  | 4.13  | 0.744   | 0.33        |           |
| Estrus (%)                                 |    |       | 26.04   | 40.42 | 4.96  | 17.34 | 0.001   | 1.13        |           |
| Diestrus (%)                               |    |       | 50.21   | 37.08 | 5.60  | 15.12 | 0.002   | 1.15        |           |
| Regular cycle (%)                          | F3 | 15/14 | 90.83   | 49.11 | 22.89 | 45.85 | 0.004   | 1.15        | 3c left   |
| Proestrus (%)                              |    |       | 24.08   | 17.73 | 5.24  | 8.87  | 0.048   | 0.87        |           |
| Estrus (%)                                 |    |       | 26.29   | 37.79 | 1.70  | 12.59 | 0.000   | 1.28        |           |
| Diestrus (%)                               |    |       | 49.65   | 44.49 | 4.57  | 6.81  | 0.048   | 0.89        |           |
| Folliculogenesis (number/mm <sup>3</sup> ) |    |       |         |       |       |       |         |             | 3a middle |
| Primordial                                 | F1 | 10/9  | 17.83   | 12.40 | 11.52 | 8.13  | 0.629   | 0.55        |           |
| Primary                                    |    |       | 6.28    | 6.68  | 4.41  | 5.95  | 0.999   | 0.08        |           |
| Secondary                                  |    |       | 3.55    | 2.71  | 1.84  | 1.57  | 0.999   | 0.49        |           |
| Antral                                     |    |       | 1.23    | 1.00  | 0.98  | 0.89  | 0.999   | 0.25        |           |
| Atretic                                    |    |       | 8.42    | 16.25 | 3.87  | 11.70 | 0.061   | 0.90        |           |
| Corpora lutea                              |    |       | 0.02    | 0.05  | 0.03  | 0.05  | 0.999   | 0.73        |           |
| Cysts                                      |    |       | 1.11    | 0.66  | 0.80  | 0.36  | 0.185   | 0.73        |           |
| Folliculogenesis (number/mm <sup>3</sup> ) |    |       |         |       |       |       |         |             | 3b middle |
| Primordial                                 | F2 | 10/9  | 21.70   | 9.09  | 16.52 | 7.62  | 0.038   | 0.98        |           |
| Primary                                    |    |       | 9.25    | 9.08  | 6.73  | 5.61  | 0.99    | 0.03        |           |
| Secondary                                  |    |       | 8.54    | 7.16  | 6.50  | 4.14  | 0.99    | 0.25        |           |
| Antral                                     |    |       | 2.55    | 0.74  | 1.16  | 0.88  | 0.045   | 1.76        |           |
| Atretic                                    |    |       | 18.08   | 33.62 | 6.79  | 25.12 | 0.014   | 0.84        |           |
| Corpora lutea                              |    |       | 0.01    | 0.12  | 0.03  | 0.16  | 0.99    | 0.97        |           |
| Cysts                                      |    |       | 0.63    | 1.13  | 1.06  | 1.36  | 0.470   | 0.41        |           |
| Folliculogenesis (number/mm <sup>3</sup> ) |    |       |         |       |       |       |         |             | 3c middle |
| Primordial                                 | F3 | 10/9  | 25.31   | 9.96  | 12.37 | 5.59  | 0.033   | 1.60        |           |
| Primary                                    |    |       | 7.00    | 8.25  | 5.37  | 8.31  | 0.999   | 0.18        |           |
| Secondary                                  |    |       | 2.49    | 3.52  | 1.98  | 2.21  | 0.988   | 0.49        |           |
| Antral                                     |    |       | 1.20    | 0.29  | 0.85  | 0.37  | 0.048   | 1.38        |           |
| Atretic                                    |    |       | 10.64   | 13.70 | 10.06 | 8.08  | 0.002   | 0.34        |           |
| Corpora lutea                              |    |       | 0.04    | 0.07  | 0.08  | 0.12  | 0.998   | 0.29        |           |
| Cysts                                      |    |       | 1.13    | 1.02  | 0.60  | 1.31  | 0.128   | 0.10        |           |
| Normalized ovarian Weight (ratio)          | F1 | 14    | 47.69   | 40.33 | 7.34  | 9.94  | 0.035   | 0.84        | 3a right  |
|                                            | F2 | 16    | 41.44   | 35.54 | 8.85  | 6.61  | 0.041   | 0.76        | 3b right  |
|                                            | F3 | 10/9  | 65.24   | 44.67 | 10.90 | 7.96  | 0.000   | 2.16        | 3c right  |

**Notes:** Effect size was calculated using Cohen's *d*. AU= arbitrary units. F= generation. N=sample size. SD: standard deviation.IP: interpulse interval.

Table S3. Report of descriptive and statistical data (continuation)

| Measure (unit)                    | F  | N     | Average |       | SD   |      | p-value | Effect Size | Figure |
|-----------------------------------|----|-------|---------|-------|------|------|---------|-------------|--------|
|                                   |    |       | CTL     | EDC   | CTL  | EDC  |         |             |        |
| <i>Kiss1</i> P6 (AU)              | F3 | 6     | 1       | 0.39  | 0.13 | 0.23 | 0.002   | 3.27        | 4a     |
| <i>Kiss1</i> P21 (AU)             |    |       | 1       | 0.51  | 0.34 | 0.29 | 0.034   | 1.56        |        |
| <i>Kiss1</i> P70 (AU)             |    |       | 1       | 0.38  | 0.07 | 0.34 | 0.026   | 2.52        |        |
| <i>Esr1</i> P6 (AU)               |    |       | 1       | 0.85  | 0.15 | 0.24 | 0.792   | 0.76        |        |
| <i>Esr1</i> P21 (AU)              |    |       | 1       | 0.32  | 0.50 | 0.32 | 0.019   | 1.61        |        |
| <i>Esr1</i> P70 (AU)              |    |       | 1       | 0.21  | 0.07 | 0.16 | 0.013   | 6.40        |        |
| <i>Oxt</i> P6 (AU)                |    |       | 1       | 0.22  | 0.75 | 0.16 | 0.012   | 1.44        |        |
| <i>Oxt</i> P21 (AU)               |    |       | 1       | 0.23  | 1.26 | 0.19 | 0.018   | 0.86        |        |
| <i>Oxt</i> P70 (AU)               |    |       | 1       | 0.36  | 0.09 | 0.33 | 0.043   | 2.64        |        |
| <i>Cart</i> P6 (AU)               |    |       | 1       | 0.77  | 0.10 | 0.78 | 0.543   | 0.41        |        |
| <i>Cart</i> P21 (AU)              |    |       | 1       | 3.24  | 0.32 | 1.66 | 0.013   | 1.88        |        |
| <i>Cart</i> P70 (AU)              |    |       | 1       | 0.87  | 0.16 | 0.43 | 0.811   | 0.41        |        |
| <i>Pomc</i> P6 (AU)               |    |       | 1       | 0.22  | 0.15 | 0.15 | 0.017   | 5.20        |        |
| <i>Pomc</i> P21 (AU)              |    |       | 1       | 2.60  | 0.15 | 1.38 | 0.023   | 1.63        |        |
| <i>Pomc</i> P70 (AU)              |    |       | 1       | 1.00  | 0.17 | 0.75 | 0.999   | 0.01        |        |
| <i>Kiss1</i> p H3K27me3 (AU)      |    |       | 1       | 10.15 | 0.34 | 6.78 | 0.008   | 1.91        | 4b     |
| <i>Kiss1</i> p H3K4me3 (AU)       |    |       | 1       | 0.22  | 0.46 | 0.09 | 0.002   | 2.38        |        |
| <i>Esr1</i> p H3K9ac (AU)         |    |       | 1       | 0.32  | 0.69 | 0.20 | 0.044   | 1.33        |        |
| <i>Oxtp</i> H3K4me3 (AU)          |    |       | 1       | 0.32  | 0.69 | 0.20 | 0.044   | 1.33        |        |
| <i>Pomcp</i> H3K4me3 (AU)         |    |       | 1       | 0.38  | 0.51 | 0.21 | 0.021   | 1.58        |        |
| Licking (min)                     | F0 | 15    | 6.52    | 5.14  | 2.64 | 3.07 | 0.218   | 0.49        | 5a     |
|                                   | F1 | 10/11 | 9.18    | 5.84  | 3.27 | 3.59 | 0.038   | 0.97        | 5b     |
|                                   | F2 | 11    | 11.93   | 6.38  | 3.72 | 3.49 | 0.008   | 1.54        | 5c     |
|                                   | F3 | 11    | 13.79   | 9.71  | 2.40 | 2.79 | 0.004   | 1.57        | 5d     |
| Resting alone (min)               | F0 | 15    | 0.57    | 0.24  | 1.09 | 0.35 | 0.369   | 0.41        | 5a     |
|                                   | F1 | 10/11 | 0.68    | 1.93  | 0.93 | 1.07 | 0.011   | 1.24        | 5b     |
|                                   | F2 | 11    | 0.44    | 1.62  | 0.43 | 1.19 | 0.021   | 1.30        | 5c     |
|                                   | F3 | 11    | 2.85    | 3.18  | 3.20 | 3.14 | 0.825   | 0.10        | 5d     |
| <i>Th</i> P6 (AU)                 | F1 | 6     | 1       | 0.65  | 0.19 | 0.27 | 0.547   | 1.51        | 6a     |
| <i>Th</i> P21 (AU)                |    |       | 1       | 0.18  | 0.64 | 0.10 | 0.031   | 1.79        |        |
| <i>Th</i> P60 (AU)                |    |       | 1       | 0.11  | 0.22 | 0.13 | 0.013   | 4.93        |        |
| <i>Dnm1</i> P6 (AU)               |    |       | 1       | 0.30  | 0.24 | 0.14 | 0.565   | 3.58        |        |
| <i>Dnm1</i> P21 (AU)              |    |       | 1       | 0.33  | 0.10 | 0.26 | 0.039   | 3.40        |        |
| <i>Dnm1</i> P60 (AU)              |    |       | 1       | 1.15  | 0.29 | 0.66 | 0.495   | 0.29        |        |
| <i>Drd1</i> P6 (AU)               |    |       | 1       | 1.22  | 0.22 | 0.33 | 0.999   | 0.79        |        |
| <i>Drd1</i> P21 (AU)              |    |       | 1       | 3.41  | 0.24 | 1.70 | 0.016   | 1.99        |        |
| <i>Drd1</i> P60 (AU)              |    |       | 1       | 0.95  | 0.14 | 0.76 | 0.999   | 0.09        |        |
| <i>Darpp32</i> P6 (AU)            |    |       | 1       | 0.75  | 0.17 | 0.29 | 0.775   | 1.05        |        |
| <i>Darpp32</i> P21 (AU)           |    |       | 1       | 0.26  | 0.73 | 0.19 | 0.095   | 1.39        |        |
| <i>Darpp32</i> P60 (AU)           |    |       | 1       | 0.19  | 0.30 | 0.09 | 0.002   | 3.64        |        |
| <i>Thp</i> methylation CpG site 1 | F1 | 6     | 0,89    | 0,88  | 0,01 | 0,02 | 0,097   | 1,19        | 6b     |
| CpG site 2                        |    |       | 0,84    | 0,84  | 0,01 | 0,01 | 0,981   | 0,02        |        |
| CpG site 3                        |    |       | 0,74    | 0,72  | 0,02 | 0,01 | 0,143   | 1,09        |        |
| CpG site 4                        |    |       | 0,73    | 0,72  | 0,02 | 0,03 | 0,727   | 0,24        |        |
| CpG site 5                        |    |       | 0,77    | 0,76  | 0,01 | 0,02 | 0,289   | 0,73        |        |
| CpG site 6                        |    |       | 0,84    | 0,83  | 0,01 | 0,01 | 0,154   | 1,02        |        |
| CpG site 7                        |    |       | 0,79    | 0,79  | 0,01 | 0,02 | 0,971   | 0,02        |        |
| CpG site 8                        |    |       | 0,63    | 0,62  | 0,01 | 0,03 | 0,457   | 0,50        |        |
| CpG site 9                        |    |       | 0,66    | 0,66  | 0,02 | 0,02 | 0,936   | 0,06        |        |
| CpG site 10                       |    |       | 0,70    | 0,69  | 0,03 | 0,02 | 0,691   | 0,28        |        |
| CpG site 11                       |    |       | 0,55    | 0,53  | 0,03 | 0,01 | 0,177   | 1,01        |        |
| CpG site 12                       |    |       | 0,83    | 0,84  | 0,01 | 0,01 | 0,648   | 0,32        |        |
| CpG site 13                       |    |       | 0,83    | 0,82  | 0,01 | 0,01 | 0,310   | 0,74        |        |

**Notes:** Effect size was calculated using Cohen's *d*. AU= arbitrary units. F= generation. N=sample size. SD: standard deviation. qPCR and ChIP data were normalized to the control group.

Table S3. Report of descriptive and statistical data (continuation)

| Measure (unit)                    | F  | N | Average |        | SD    |       | p-value | Effect Size | Figure |
|-----------------------------------|----|---|---------|--------|-------|-------|---------|-------------|--------|
|                                   |    |   | CTL     | EDC    | CTL   | EDC   |         |             |        |
| <i>Thp</i> H3K27me3 (AU)          | F1 | 6 | 1       | 3.12   | 0.52  | 2.10  | 0.019   | 1.39        | 6c     |
| <i>Thp</i> H3K9me3 (AU)           |    |   | 1       | 1.32   | 1.12  | 1.27  | 0.657   | 0.26        |        |
| <i>Thp</i> H3K4me3 (AU)           |    |   | 1       | 1.19   | 0.27  | 0.77  | 0.581   | 0.33        |        |
| <i>Thp</i> H3K9ac (AU)            |    |   | 1       | 1.21   | 0.64  | 0.67  | 0.591   | 0.32        |        |
| <i>Th</i> -ir SN (number)         |    |   | 92.7    | 87.64  | 21.05 | 21.15 | 0.687   | 0.24        | 6e     |
| <i>Th</i> -ir VTA (number)        |    |   | 125.3   | 116.20 | 26.47 | 24.22 | 0.549   | 0.36        |        |
| <i>Th</i> -ir mPoA (number)       |    |   | 3.98    | 2.53   | 0.61  | 0.36  | 0.001   | 2.90        |        |
| <i>Th</i> P6 (AU)                 | F3 |   | 1       | 0.40   | 0.89  | 0.37  | 0.248   | 0.88        | 6f     |
| <i>Th</i> P21 (AU)                |    |   | 1       | 0.36   | 0.16  | 0.17  | 0.040   | 3.8         |        |
| <i>Th</i> P60 (AU)                |    |   | 1       | 0.46   | 0.91  | 0.44  | 0.395   | 0.77        |        |
| <i>Drd1</i> P6 (AU)               |    |   | 1       | 0.36   | 0.58  | 0.23  | 0.486   | 1.45        |        |
| <i>Drd1</i> P21 (AU)              |    |   | 1       | 0.47   | 0.11  | 0.15  | 0.042   | 4.03        |        |
| <i>Drd1</i> P60 (AU)              |    |   | 1       | 0.15   | 0.17  | 0.25  | 0.001   | 3.98        |        |
| <i>Thp</i> methylation CpG site 1 | F3 |   | 0,92    | 0,92   | 0,02  | 0,02  | 0,782   | 0,18        | 6g     |
| CpG site 2                        |    |   | 0,88    | 0,89   | 0,02  | 0,02  | 0,749   | 0,21        |        |
| CpG site 3                        |    |   | 0,76    | 0,77   | 0,04  | 0,04  | 0,475   | 0,47        |        |
| CpG site 4                        |    |   | 0,77    | 0,81   | 0,02  | 0,03  | 0,018   | 1,78        |        |
| CpG site 5                        |    |   | 0,83    | 0,85   | 0,04  | 0,01  | 0,286   | 0,71        |        |
| CpG site 6                        |    |   | 0,86    | 0,89   | 0,02  | 0,01  | 0,023   | 1,69        |        |
| CpG site 7                        |    |   | 0,83    | 0,80   | 0,03  | 0,03  | 0,170   | 0,94        |        |
| CpG site 8                        |    |   | 0,66    | 0,66   | 0,04  | 0,05  | 0,883   | 0,10        |        |
| CpG site 9                        |    |   | 0,74    | 0,68   | 0,04  | 0,05  | 0,062   | 1,33        |        |
| CpG site 10                       |    |   | 0,76    | 0,80   | 0,03  | 0,06  | 0,110   | 1,11        |        |
| CpG site 11                       |    |   | 0,55    | 0,62   | 0,02  | 0,04  | 0,004   | 2,37        |        |
| CpG site 12                       |    |   | 0,86    | 0,86   | 0,03  | 0,04  | 0,940   | 0,05        |        |
| CpG site 13                       |    |   | 0,90    | 0,89   | 0,04  | 0,04  | 0,650   | 0,30        |        |
| <i>Thp</i> H3K27me3 (AU)          |    |   | 1       | 2.16   | 0.47  | 1.62  | 0.124   | 0.97        | 6h     |
| <i>Thp</i> H3K9me3 (AU)           |    |   | 1       | 2.17   | 0.38  | 1.13  | 0.037   | 1.38        |        |
| <i>Thp</i> H3K4me3 (AU)           |    |   | 1       | 0.90   | 0.36  | 0.43  | 0.657   | 0.26        |        |
| <i>Thp</i> H3K9ac (AU)            |    |   | 1       | 1.04   | 0.33  | 0.51  | 0.888   | 0.08        |        |

**Notes:** Effect size was calculated using Cohen's  $d$ . AU= arbitrary units. F= generation. N=sample size. SD: standard deviation. qPCR and ChIP data were normalized to the control group.

Table S4. Report of descriptive data and statistical analysis of crossfostering data.

| Measure (unit)               | F    | N     | Group | Average | SD    | Comparison | p-value | Effect Size | Figure |
|------------------------------|------|-------|-------|---------|-------|------------|---------|-------------|--------|
| Vaginal opening (days)       | F2-C | 16/19 | CC    | 34.67   | 1.56  | CC vs. CE  | 0.003   | 1.29        | 7a     |
|                              |      |       | CE    | 37.05   | 2.09  | CC vs. EE  | 0.003   | 1.46        |        |
|                              |      |       | EE    | 37.13   | 1.81  | CE vs. EC  | 0.001   | 1.30        |        |
|                              |      |       | EC    | 34.72   | 1.45  | EE vs. EC  | 0.001   | 1.47        |        |
| Regular cycle (%)            |      | 10    | CC    | 85.00   | 18.34 | CC vs. CE  | 0.485   | 0.23        | 7b     |
|                              |      |       | CE    | 75.00   | 27.50 | CC vs. EE  | 0.775   | 0.42        |        |
|                              |      |       | EE    | 75.00   | 23.90 | CE vs. EC  | 0.813   | 0.30        |        |
|                              |      |       | EC    | 88.33   | 17.66 | EE vs. EC  | 0.715   | 0.51        |        |
| Proestrus (%)                |      |       | CC    | 21.25   | 3.65  | CC vs. CE  | 0.999   | 0.04        |        |
|                              |      |       | CE    | 19.58   | 6.53  | CC vs. EE  | 0.999   | 0.03        |        |
|                              |      |       | EE    | 22.08   | 4.83  | CE vs. EC  | 0.999   | 0.07        |        |
|                              |      |       | EC    | 22.92   | 2.95  | EE vs. EC  | 0.988   | 0.03        |        |
| Estrus (%)                   |      |       | CC    | 23.33   | 3.51  | CC vs. CE  | 0.997   | 0.12        |        |
|                              |      |       | CE    | 25.83   | 6.15  | CC vs. EE  | 0.008   | 1.13        |        |
|                              |      |       | EE    | 32.50   | 10.90 | CE vs. EC  | 0.587   | 0.23        |        |
|                              |      |       | EC    | 26.25   | 4.41  | EE vs. EC  | 0.916   | 0.62        |        |
| Diestrus (%)                 |      |       | CC    | 55.42   | 6.23  | CC vs. CE  | 0.999   | 0.04        |        |
|                              |      |       | CE    | 54.58   | 8.21  | CC vs. EE  | 0.002   | 1.30        |        |
|                              |      |       | EE    | 45.42   | 8.88  | CE vs. EE  | 0.008   | 1.07        |        |
|                              |      |       | EC    | 50.83   | 4.30  | EE vs. EC  | 0.299   | 0.42        |        |
| <i>Kiss1</i> (AU)            |      | 6     | CC    | 1.00    | 0.19  | CC vs. CE  | 0.001   | 2.94        | 7c     |
|                              |      |       | CE    | 0.46    | 0.18  | CC vs. EE  | 0.012   | 2.03        |        |
|                              |      |       | EE    | 0.61    | 0.20  | CE vs. EC  | 0.000   | 2.96        |        |
|                              |      |       | EC    | 1.05    | 0.22  | EE vs. EC  | 0.004   | 2.13        |        |
| <i>Esr1</i> (AU)             |      |       | CC    | 1.00    | 0.41  | CC vs. CE  | 0.015   | 2.12        | 7d     |
|                              |      |       | CE    | 0.36    | 0.12  | CC vs. EE  | 0.038   | 1.84        |        |
|                              |      |       | EE    | 0.44    | 0.13  | CE vs. EC  | 0.006   | 2.03        |        |
|                              |      |       | EC    | 1.07    | 0.48  | EE vs. EC  | 0.017   | 1.79        |        |
| <i>Oxt</i> (AU)              |      |       | CC    | 1.00    | 0.22  | CC vs. CE  | 0.003   | 2.68        | 7e     |
|                              |      |       | CE    | 0.42    | 0.22  | CC vs. EE  | 0.005   | 2.87        |        |
|                              |      |       | EE    | 0.44    | 0.17  | CE vs. EC  | 0.001   | 2.17        |        |
|                              |      |       | EC    | 1.06    | 0.36  | EE vs. EC  | 0.002   | 2.22        |        |
| <i>Th</i> (AU)               |      |       | CC    | 1.00    | 0.10  | CC vs. CE  | 0.001   | 3.42        | 7f     |
|                              |      |       | CE    | 1.14    | 0.26  | CC vs. EE  | 0.000   | 5.02        |        |
|                              |      |       | EE    | 0.37    | 0.15  | CE vs. EE  | 0.000   | 3.68        |        |
|                              |      |       | EC    | 0.52    | 0.17  | CE vs. EC  | 0.000   | 2.83        |        |
| <i>Kiss1</i> (AU)            | F3-C |       | CC    | 1.00    | 0.35  | CC vs. CE  | 0.027   | 1.42        | 7c     |
|                              |      |       | CE    | 0.56    | 0.26  | CC vs. EE  | 0.043   | 1.47        |        |
|                              |      |       | EE    | 0.59    | 0.18  | CE vs. EC  | 0.007   | 2.53        |        |
|                              |      |       | EC    | 1.09    | 0.14  | EE vs. EC  | 0.011   | 3.08        |        |
| <i>Esr1</i> (AU)             |      |       | CC    | 1.00    | 0.20  | CC vs. CE  | 0.001   | 3.09        | 7d     |
|                              |      |       | CE    | 0.29    | 0.26  | CC vs. EE  | 0.002   | 3.15        |        |
|                              |      |       | EE    | 0.32    | 0.23  | CE vs. EC  | 0.002   | 2.15        |        |
|                              |      |       | EC    | 0.97    | 0.36  | EE vs. EC  | 0.003   | 2.12        |        |
| <i>Oxt</i> (AU)              |      |       | CC    | 1.00    | 0.20  | CC vs. EC  | 0.275   | 0.42        | 7e     |
|                              |      |       | CE    | 0.57    | 0.11  | CC vs. EE  | 0.057   | 0.42        |        |
|                              |      |       | EE    | 0.56    | 0.16  | CE vs. EC  | 0.003   | 1.49        |        |
|                              |      |       | EC    | 1.27    | 0.52  | EE vs. EC  | 0.003   | 2.63        |        |
| <i>Th</i> (AU)               |      |       | CC    | 1.00    | 0.25  | CC vs. EC  | 0.000   | 2.89        | 7f     |
|                              |      |       | CE    | 1.00    | 0.22  | CC vs. EE  | 0.000   | 3.22        |        |
|                              |      |       | EE    | 0.37    | 0.12  | CE vs. EE  | 0.000   | 3.50        |        |
|                              |      |       | EC    | 0.32    | 0.22  | CE vs. EC  | 0.000   | 3.05        |        |
| <i>Kiss1</i> p H3K27me3 (AU) |      |       | CC    | 1.00    | 0.18  | CC vs. CE  | 0.011   | 2.05        | 7c     |
|                              |      |       | CE    | 2.18    | 0.79  | CC vs. EE  | 0.004   | 0.74        |        |
|                              |      |       | EE    | 2.33    | 0.67  | EE vs. EC  | 0.005   | 2.17        |        |
|                              |      |       | EC    | 1.04    | 0.50  | CE vs. EC  | 0.015   | 1.72        |        |
| <i>Esr1</i> p H3K9ac (AU)    |      |       | CC    | 1.00    | 0.41  | CC vs. CE  | 0.039   | 1.86        | 7d     |
|                              |      |       | CE    | 0.41    | 0.17  | CC vs. EE  | 0.046   | 1.81        |        |
|                              |      |       | EE    | 0.43    | 0.17  | CE vs. EC  | 0.744   | 0.24        |        |
|                              |      |       | EC    | 0.94    | 0.51  | EE vs. EC  | 0.999   | 0.12        |        |
| <i>Oxt</i> p H3K4me3 (AU)    |      |       | CC    | 1.00    | 0.48  | CC vs. CE  | 0.428   | 0.01        | 7e     |
|                              |      |       | EC    | 1.24    | 0.35  | CC vs. EE  | 0.044   | 1.54        |        |
|                              |      |       | EE    | 0.44    | 0.20  | CE vs. EC  | 0.012   | 2.19        |        |
|                              |      |       | CE    | 0.55    | 0.27  | EE vs. EC  | 0.003   | 2.78        |        |
| <i>Th</i> p H3K27me3 (AU)    |      |       | CC    | 1.00    | 0.24  | CC vs. CE  | 0.000   | 0.17        | 7f     |
|                              |      |       | CE    | 0.96    | 0.23  | CC vs. EE  | 0.000   | 4.46        |        |
|                              |      |       | EE    | 2.11    | 0.26  | EE vs. EC  | 0.000   | 0.12        |        |
|                              |      |       | EC    | 2.07    | 0.48  | CE vs. EC  | 0.000   | 2.91        |        |

**Notes:** Effect size was calculated using Cohen's *d*. AU= arbitrary units. F= generation. N=sample size. SD: standard deviation. IP: interpulseinterval.

Table S5. Report of descriptive and statistical data from supplementary material.

| Measure (unit)               | F  | N    | Average |        | SD    |       | p-value | Effect Size | Figure |
|------------------------------|----|------|---------|--------|-------|-------|---------|-------------|--------|
|                              |    |      | CTL     | EDC    | CTL   | EDC   |         |             |        |
| Body weight (g)              | F1 | 14   | 256.79  | 254.50 | 25.21 | 19.92 | 0.80    | 0.10        | S1     |
| Ovarian weight (mg)          |    | 14   | 47.69   | 40.33  | 7.34  | 9.94  | 0.03    | 0.84        |        |
| Body weight (g)              | F2 | 16   | 256.80  | 260.40 | 24.47 | 23.97 | 0.67    | 0.15        |        |
| Ovarian weight (mg)          |    | 16   | 41.44   | 35.54  | 8.85  | 6.61  | 0.04    | 0.76        |        |
| Body weight (g)              | F3 | 10/9 | 257.70  | 265.40 | 20.91 | 26.02 | 0.48    | 0.33        |        |
| Ovarian weight (mg)          |    |      | 65.24   | 44.67  | 10.90 | 7.96  | 0.00    | 0.33        |        |
| <i>Nr3c1</i> P6 (AU)         |    | 6    | 1.00    | 0.79   | 0.46  | 0.10  | 0.95    | 0.62        | S3     |
| <i>Nr3c1</i> P21 (AU)        |    |      | 1.00    | 0.38   | 0.31  | 0.16  | 0.16    | 2.54        |        |
| <i>Nr3c1</i> P60 (AU)        |    |      | 1.00    | 0.26   | 0.74  | 0.14  | 0.04    | 1.58        |        |
| <i>Crh</i> P6 (AU)           |    |      | 1.00    | 0.17   | 0.38  | 0.11  | 0.03    | 3.01        |        |
| <i>Crh</i> P21 (AU)          |    |      | 1.00    | 2.66   | 0.47  | 1.28  | 0.02    | 1.72        |        |
| <i>Crh</i> P60 (AU)          |    |      | 1.00    | 2.11   | 0.63  | 1.10  | 0.04    | 1.24        |        |
| <i>Grin2d</i> P6 (AU)        |    |      | 1.00    | 0.37   | 0.99  | 0.13  | 0.09    | 2.17        |        |
| <i>Grin2d</i> P21 (AU)       |    |      | 1.00    | 0.21   | 0.39  | 0.10  | 0.04    | 2.74        |        |
| <i>Grin2d</i> P60 (AU)       |    |      | 1.00    | 0.22   | 0.42  | 0.22  | 0.05    | 2.33        |        |
| <i>Grid2</i> P6 (AU)         |    |      | 1.00    | 0.39   | 0.36  | 0.20  | 0.25    | 2.09        |        |
| <i>Grid2</i> P21 (AU)        |    |      | 1.00    | 0.24   | 0.36  | 0.13  | 0.04    | 2.80        |        |
| <i>Grid2</i> P60 (AU)        |    |      | 1.00    | 0.43   | 0.26  | 0.35  | 0.08    | 1.39        |        |
| <i>Avp</i> P6 (AU)           |    |      | 1.00    | 1.33   | 0.71  | 2.34  | 0.77    | 0.19        |        |
| <i>Avp</i> P21 (AU)          |    |      | 1.00    | 0.40   | 0.21  | 0.23  | 0.05    | 0.99        |        |
| <i>Avp</i> P60 (AU)          |    |      | 1.00    | 0.65   | 0.67  | 0.64  | 0.86    | 0.54        |        |
| <i>Kiss1p</i> H3K27me3 (AU)  |    |      | 1.00    | 1.39   | 0.63  | 0.56  | 0.29    | 0.65        | S4     |
| <i>Kiss1p</i> H3K9me3 (AU)   |    |      | 1.00    | 10.15  | 0.34  | 6.78  | 0.01    | 1.90        |        |
| <i>Kiss1p</i> H3K4me3 (AU)   |    |      | 1.00    | 0.22   | 0.46  | 0.09  | 0.00    | 2.38        |        |
| <i>Kiss1p</i> H3K9ac (AU)    |    |      | 1.00    | 0.69   | 0.52  | 0.81  | 0.45    | 0.45        |        |
| <i>Esr1p</i> H3K27me3 (AU)   |    |      | 1.00    | 0.85   | 0.61  | 0.17  | 0.56    | 0.34        |        |
| <i>Esr1p</i> H3K9me3 (AU)    |    |      | 1.00    | 0.86   | 0.46  | 0.27  | 0.56    | 0.36        |        |
| <i>Esr1p</i> H3K4me3 (AU)    |    |      | 1.00    | 1.17   | 0.32  | 0.32  | 0.39    | 0.52        |        |
| <i>Esr1p</i> H3K9ac (AU)     |    |      | 1.00    | 0.45   | 0.22  | 0.37  | 0.02    | 1.80        |        |
| <i>Oxtp</i> H3K27me3 (AU)    |    |      | 1.00    | 1.51   | 0.90  | 0.73  | 0.31    | 0.62        |        |
| <i>Oxtp</i> H3K9me3 (AU)     |    |      | 1.00    | 0.96   | 0.58  | 0.61  | 0.92    | 0.06        |        |
| <i>Oxtp</i> H3K4me3 (AU)     |    |      | 1.00    | 0.32   | 0.69  | 0.20  | 0.04    | 1.33        |        |
| <i>Oxtp</i> H3K9ac (AU)      |    |      | 1.00    | 1.13   | 0.44  | 0.53  | 0.66    | 0.26        |        |
| <i>Pomcp</i> H3K27me3 (AU)   |    |      | 1.00    | 0.87   | 0.92  | 0.63  | 0.79    | 0.16        |        |
| <i>Pomcp</i> H3K9me3 (AU)    |    |      | 1.00    | 1.06   | 0.37  | 0.21  | 0.72    | 0.21        |        |
| <i>Pomcp</i> H3K4me3 (AU)    |    |      | 1.00    | 0.38   | 0.51  | 0.21  | 0.02    | 1.58        |        |
| <i>Pomcp</i> H3K9ac (AU)     |    |      | 1.00    | 2.22   | 0.89  | 2.44  | 0.27    | 0.67        |        |
| <i>Cartp</i> H3K27me3 (AU)   |    |      | 1.00    | 1.35   | 0.78  | 1.41  | 0.61    | 0.30        |        |
| <i>Cartp</i> H3K9me3 (AU)    |    |      | 1.00    | 1.03   | 1.03  | 1.02  | 0.96    | 0.03        |        |
| <i>Cartp</i> H3K4me3 (AU)    |    |      | 1.00    | 1.09   | 0.60  | 0.60  | 0.79    | 0.16        |        |
| <i>Cartp</i> H3K9ac (AU)     |    |      | 1.00    | 1.22   | 1.16  | 0.61  | 0.69    | 0.24        |        |
| <i>Nr3c1p</i> H3K27me3 (AU)  |    |      | 1.00    | 3.27   | 0.34  | 1.97  | 0.02    | 1.61        |        |
| <i>Nr3c1p</i> H3K9me3 (AU)   |    |      | 1.00    | 2.76   | 0.46  | 1.27  | 0.05    | 1.84        |        |
| <i>Nr3c1p</i> H3K4me3 (AU)   |    |      | 1.00    | 0.45   | 0.22  | 0.37  | 0.01    | 1.80        |        |
| <i>Nr3c1p</i> H3K9ac (AU)    |    |      | 1.00    | 0.51   | 0.50  | 0.28  | 0.09    | 1.20        |        |
| <i>Crhp</i> H3K27me3 (AU)    |    |      | 1.00    | 0.16   | 0.77  | 0.11  | 0.02    | 1.54        |        |
| <i>Crhp</i> H3K9me3 (AU)     |    |      | 1.00    | 1.56   | 0.69  | 0.74  | 0.21    | 0.78        |        |
| <i>Crhp</i> H3K4me3 (AU)     |    |      | 1.00    | 1.49   | 0.28  | 0.86  | 0.21    | 0.77        |        |
| <i>Crhp</i> H3K9ac (AU)      |    |      | 1.00    | 2.44   | 0.80  | 1.25  | 0.04    | 1.37        |        |
| <i>Grin2dp</i> H3K27me3 (AU) |    |      | 1.00    | 2.29   | 0.44  | 1.63  | 0.09    | 1.08        |        |
| <i>Grin2dp</i> H3K9me3 (AU)  |    |      | 1.00    | 1.27   | 0.52  | 0.73  | 0.55    | 0.43        |        |
| <i>Grin2dp</i> H3K4me3 (AU)  |    |      | 1.00    | 1.36   | 0.46  | 0.48  | 0.24    | 0.76        |        |
| <i>Grin2dp</i> H3K9ac (AU)   |    |      | 1.00    | 2.22   | 0.89  | 2.44  | 0.27    | 0.67        |        |

**Notes:** Effect size was calculated using Cohen's *d*. AU= arbitrary units. F= generation. N=sample size. SD: standard deviation.

Table S5. Report of descriptive and statistical data from supplementary material (continuation).

| Measure (unit)                    | F  | N     | Average |       | SD    |       | p-value | Effect Size | Figure     |
|-----------------------------------|----|-------|---------|-------|-------|-------|---------|-------------|------------|
|                                   |    |       | CTL     | EDC   | CTL   | EDC   |         |             |            |
| Nest-building (minutes)           | F0 | 12/15 | 2.18    | 2.19  | 1.83  | 1.96  | 0.99    | 0.01        | S5         |
| Arched-back nursing (minutes)     |    |       | 22.69   | 22.76 | 8.78  | 12.18 | 0.99    | 0.01        |            |
| Blanket nursing (minutes)         |    |       | 0.46    | 0.17  | 1.20  | 0.31  | 0.44    | 0.33        |            |
| Passive nursing (minutes)         |    |       | 0.63    | 0.52  | 0.73  | 0.58  | 0.69    | 0.17        |            |
| Total maternal behavior (minutes) |    |       | 28.03   | 26.03 | 9.33  | 12.42 | 0.65    | 0.18        |            |
| Eating/drinking (minutes)         |    |       | 8.24    | 6.38  | 4.06  | 4.19  | 0.27    | 0.45        |            |
| Self-grooming (minutes)           |    |       | 5.29    | 5.04  | 1.38  | 3.48  | 0.80    | 0.10        |            |
| Active (minutes)                  |    |       | 9.76    | 7.90  | 3.65  | 4.11  | 0.24    | 0.48        |            |
| Total off-nest behavior (minutes) |    |       | 22.36   | 18.31 | 6.66  | 5.65  | 0.12    | 0.66        |            |
| Nest-building (minutes)           | F1 | 10/11 | 3.51    | 2.21  | 1.32  | 1.42  | 0.05    | 0.94        | S6         |
| Arched-back nursing (minutes)     |    |       | 26.64   | 27.16 | 7.26  | 3.42  | 0.84    | 0.09        |            |
| Blanket nursing (minutes)         |    |       | 1.81    | 0.44  | 2.79  | 0.48  | 0.15    | 0.68        |            |
| Passive nursing (minutes)         |    |       | 0.23    | 0.19  | 0.34  | 0.24  | 0.77    | 0.14        |            |
| Total maternal behavior (minutes) |    |       | 40.85   | 38.73 | 10.97 | 9.71  | 0.66    | 0.20        |            |
| Eating/drinking (minutes)         |    |       | 5.11    | 4.95  | 1.28  | 1.88  | 0.82    | 0.10        |            |
| Self-grooming (minutes)           |    |       | 6.44    | 7.02  | 1.76  | 2.70  | 0.59    | 0.25        |            |
| Active (minutes)                  |    |       | 16.34   | 15.40 | 7.51  | 8.18  | 0.80    | 0.12        |            |
| Total off-nest behavior (minutes) |    |       | 28.76   | 24.61 | 8.35  | 11.28 | 0.38    | 0.42        |            |
| Nest-building (minutes)           | F2 | 8     | 5.36    | 8.89  | 1.54  | 7.13  | 0.20    | 0.68        | S7         |
| Arched-back nursing (minutes)     |    |       | 16.26   | 14.72 | 5.83  | 4.54  | 0.87    | 0.29        |            |
| Blanket nursing (minutes)         |    |       | 1.24    | 1.02  | 1.05  | 0.85  | 0.90    | 0.23        |            |
| Passive nursing (minutes)         |    |       | 0.04    | 0.09  | 0.06  | 0.15  | 0.23    | 0.48        |            |
| Total maternal behavior (minutes) |    |       | 38.43   | 31.88 | 7.81  | 7.13  | 0.24    | 0.88        |            |
| Eating/drinking (minutes)         |    |       | 7.93    | 8.67  | 1.68  | 3.11  | 0.55    | 0.30        |            |
| Self-grooming (minutes)           |    |       | 3.85    | 6.43  | 1.22  | 1.91  | 0.02    | 1.61        |            |
| Active (minutes)                  |    |       | 8.84    | 11.05 | 2.51  | 1.14  | 0.06    | 1.13        |            |
| Total off-nest behavior (minutes) |    |       | 21.06   | 27.76 | 3.43  | 5.70  | 0.12    | 1.43        |            |
| Nest-building (minutes)           | F3 | 8/11  | 10.01   | 10.73 | 2.62  | 2.37  | 0.56    | 0.29        | S8         |
| Arched-back nursing (minutes)     |    |       | 15.66   | 14.99 | 6.23  | 4.89  | 0.81    | 0.12        |            |
| Blanket nursing (minutes)         |    |       | 0.64    | 0.29  | 0.69  | 0.46  | 0.22    | 0.60        |            |
| Passive nursing (minutes)         |    |       | 0.11    | 0.15  | 0.06  | 0.08  | 0.29    | 0.55        |            |
| Total maternal behavior (minutes) |    |       | 40.64   | 36.30 | 9.14  | 6.06  | 0.26    | 0.56        |            |
| Eating/drinking (minutes)         |    |       | 8.05    | 8.19  | 1.61  | 1.48  | 0.86    | 0.09        |            |
| Self-grooming (minutes)           |    |       | 6.63    | 7.40  | 3.76  | 2.66  | 0.63    | 0.24        |            |
| Active (minutes)                  |    |       | 6.53    | 4.97  | 3.74  | 3.13  | 0.36    | 0.45        |            |
| Total off-nest behavior (minutes) |    |       | 24.07   | 23.74 | 6.70  | 4.88  | 0.91    | 0.06        |            |
| <i>Nr3c1</i> (AU)                 | F1 | 6     | 1.00    | 0.89  | 0.29  | 0.14  | 0.41    | 0.49        | S10 top    |
| <i>Crh</i> (AU)                   |    |       | 1.00    | 1.06  | 0.56  | 0.24  | 0.82    | 0.14        |            |
| <i>Darpp32p</i> H3K9me3 (AU)      |    |       | 1.00    | 0.80  | 0.65  | 0.86  | 0.65    | 0.27        | S10 middle |
| <i>Darpp32p</i> H3K27me3 (AU)     |    |       | 1.00    | 1.24  | 1.08  | 0.99  | 0.70    | 0.23        |            |
| <i>Darpp32p</i> H3K4me3 (AU)      |    |       | 1.00    | 0.72  | 1.05  | 0.87  | 0.62    | 0.29        |            |
| <i>Darpp32p</i> H3K9ac (AU)       |    |       | 1.00    | 0.49  | 0.96  | 0.55  | 0.29    | 0.65        |            |
| <i>Drd1p</i> H3K9me3 (AU)         |    |       | 1.00    | 0.56  | 1.02  | 0.60  | 0.38    | 0.53        | S10 bottom |
| <i>Drd1p</i> H3K27me3 (AU)        |    |       | 1.00    | 1.24  | 1.08  | 0.99  | 0.70    | 0.23        |            |
| <i>Drd1p</i> H3K4me3 (AU)         |    |       | 1.00    | 0.72  | 1.05  | 0.87  | 0.62    | 0.29        |            |
| <i>Drd1pp</i> H3K9ac (AU)         |    |       | 1.00    | 0.49  | 0.96  | 0.55  | 0.29    | 0.65        |            |

**Notes:** Effect size was calculated using Cohen's *d*. AU= arbitrary units. F= generation. N=sample size. SD: standard deviation.

Table S6. Report of descriptive data and statistical analysis of crossfostering data from the supplementary material.

| Measure (unit)              | F    | N | Group | Average | SD   | Comparison | p-value | Effect Size | Figure |
|-----------------------------|------|---|-------|---------|------|------------|---------|-------------|--------|
| <i>Kiss1p</i> H3K4me3 (AU)  | F2-C | 6 | CC    | 1.00    | 0.24 | CC vs. CE  | 0.00    | 2.77        | S11a   |
|                             |      |   | CE    | 0.43    | 0.16 | CC vs. EE  | 0.00    | 3.27        |        |
|                             |      |   | EE    | 0.37    | 0.13 | CE vs. EC  | 0.01    | 2.72        |        |
|                             |      |   | EC    | 0.80    | 0.10 | EE vs. EC  | 0.00    | 3.70        |        |
| <i>Esr1p</i> H3K4me3 (AU)   |      |   | CC    | 1.00    | 0.30 | CC vs. CE  | 0.99    | 0.11        |        |
|                             |      |   | CE    | 1.07    | 0.84 | CC vs. EE  | 0.98    | 0.34        |        |
|                             |      |   | EE    | 0.89    | 0.34 | CE vs. EC  | 1.00    | 0.03        |        |
|                             |      |   | EC    | 1.09    | 0.26 | EE vs. EC  | 0.89    | 0.66        |        |
| <i>Oxtp</i> H3K4me3 (AU)    |      |   | CC    | 1.00    | 0.48 | CC vs. CE  | 0.13    | 1.17        |        |
|                             |      |   | CE    | 0.55    | 0.27 | CC vs. EE  | 0.04    | 1.54        |        |
|                             |      |   | EE    | 0.44    | 0.20 | CE vs. EC  | 0.01    | 2.19        |        |
|                             |      |   | EC    | 1.24    | 0.35 | EE vs. EC  | 0.00    | 2.77        |        |
| <i>Thp</i> H3K4me3 (AU)     |      |   | CC    | 1.00    | 0.43 | CC vs. CE  | 1.00    | 0.08        |        |
|                             |      |   | CE    | 0.96    | 0.52 | CC vs. EE  | 1.00    | 0.13        |        |
|                             |      |   | EE    | 0.95    | 0.32 | CE vs. EC  | 1.00    | 0.05        |        |
|                             |      |   | EC    | 0.99    | 0.36 | EE vs. EC  | 1.00    | 0.11        |        |
| <i>Kiss1p</i> H3K9ac (AU)   |      |   | CC    | 1.00    | 0.33 | CC vs. CE  | 0.94    | 0.26        | S11b   |
|                             |      |   | CE    | 1.17    | 0.84 | CC vs. EE  | 0.99    | 0.26        |        |
|                             |      |   | EE    | 0.91    | 0.33 | CE vs. EC  | 0.82    | 0.40        |        |
|                             |      |   | EC    | 0.91    | 0.39 | EE vs. EC  | 1.00    | 0.02        |        |
| <i>Esr1p</i> H3K9ac (AU)    |      |   | CC    | 1.00    | 0.41 | CC vs. CE  | 0.04    | 1.86        |        |
|                             |      |   | CE    | 0.41    | 0.17 | CC vs. EE  | 0.05    | 1.81        |        |
|                             |      |   | EE    | 0.43    | 0.17 | CE vs. EC  | 0.07    | 1.40        |        |
|                             |      |   | EC    | 0.94    | 0.51 | EE vs. EC  | 0.08    | 1.35        |        |
| <i>Oxtp</i> H3K9ac (AU)     |      |   | CC    | 1.00    | 0.45 | CC vs. CE  | 0.43    | 0.80        |        |
|                             |      |   | CE    | 0.71    | 0.23 | CC vs. EE  | 0.95    | 0.27        |        |
|                             |      |   | EE    | 0.90    | 0.27 | CE vs. EC  | 0.64    | 0.84        |        |
|                             |      |   | EC    | 0.93    | 0.29 | EE vs. EC  | 1.00    | 0.11        |        |
| <i>Thp</i> H3K9ac (AU)      |      |   | CC    | 1.01    | 0.59 | CC vs. CE  | 0.95    | 0.26        |        |
|                             |      |   | CE    | 1.21    | 0.89 | CC vs. EE  | 1.00    | 0.13        |        |
|                             |      |   | EE    | 1.08    | 0.50 | CE vs. EC  | 0.87    | 0.40        |        |
|                             |      |   | EC    | 0.93    | 0.40 | EE vs. EC  | 0.98    | 0.33        |        |
| <i>Kiss1p</i> H3K27me3 (AU) |      |   | CC    | 1.00    | 0.18 | CC vs. CE  | 0.01    | 2.05        | S11c   |
|                             |      |   | CE    | 2.18    | 0.79 | CC vs. EE  | 0.00    | 2.69        |        |
|                             |      |   | EE    | 2.33    | 0.67 | CE vs. EC  | 0.01    | 1.72        |        |
|                             |      |   | EC    | 1.04    | 0.50 | EE vs. EC  | 0.01    | 2.17        |        |
| <i>Esr1p</i> H3K27me3 (AU)  |      |   | CC    | 1.00    | 0.27 | CC vs. CE  | 0.98    | 0.23        |        |
|                             |      |   | CE    | 0.92    | 0.40 | CC vs. EE  | 1.00    | 0.02        |        |
|                             |      |   | EE    | 0.99    | 0.32 | CE vs. EC  | 0.44    | 0.75        |        |
|                             |      |   | EC    | 1.25    | 0.48 | EE vs. EC  | 0.64    | 0.63        |        |
| <i>Oxtp</i> H3K27me3 (AU)   |      |   | CC    | 1.00    | 0.27 | CC vs. CE  | 0.97    | 0.28        |        |
|                             |      |   | CE    | 0.94    | 0.14 | CC vs. EE  | 0.97    | 0.26        |        |
|                             |      |   | EE    | 0.95    | 0.13 | CE vs. EC  | 0.76    | 0.54        |        |
|                             |      |   | EC    | 1.07    | 0.31 | EE vs. EC  | 0.79    | 0.52        |        |
| <i>Thp</i> H3K27me3 (AU)    |      |   | CC    | 1.00    | 0.24 | CC vs. CE  | 1.00    | 0.17        |        |
|                             |      |   | CE    | 0.96    | 0.24 | CC vs. EE  | 0.00    | 4.46        |        |
|                             |      |   | EE    | 2.11    | 0.26 | CE vs. EC  | 0.00    | 2.91        |        |
|                             |      |   | EC    | 2.07    | 0.48 | EE vs. EC  | 0.99    | 0.12        |        |

**Notes:** Effect size was calculated using Cohen's *d*. AU= arbitrary units. F= generation. N=sample size. SD: standard deviation
