# Supplementary material
Source: PubMed Central journal article supplement (PMC8360047)
Supplement: ehp8795.smcontents.508.pdf [file ehp8795.smcontents.508.pdf]

**Note to readers with disabilities:** *EHP* strives to ensure that all journal content is accessible to all readers. However, some figures and Supplemental Material published in *EHP* articles may not conform to [508 standards](#) due to the complexity of the information being presented. If you need assistance accessing journal content, please contact [ehp508@niehs.nih.gov](mailto:ehp508@niehs.nih.gov). Our staff will work with you to assess and meet your accessibility needs within 3 working days.

### **Supplemental Material**

#### **Multi- and Transgenerational Outcomes of an Exposure to a Mixture of Endocrine-Disrupting Chemicals (EDCs) on Puberty and Maternal Behavior in the Female Rat**

David López-Rodríguez, Carlos Francisco Aylwin, Virginia Delli, Elena Sevrin, Marzia Campanile, Marion Martin, Delphine Franssen, Arlette Gérard, Silvia Blacher, Ezio Tirelli, Agnès Noël, Alejandro Lomniczi, and Anne-Simone Parent

#### **Table of Contents**

**Figure S1.** Body weight and ovarian weight measured at P60 in F1 (n=14/group), F2 (n=16/group) and F3 (n=9-10/group) females. Measurements are displayed in grams. Bars represent mean  $\pm$ s.e.m. (\*P < 0.05, \*\*\*P < 0.001 vs. CTL, Student's t-test). Summary data are reported in Table S5.

**Figure S2.** Fold enrichment of gene ontology (GO) annotations using David pathway analysis across compared groups (CTL vs EDC) in the MBH-PoA of F3 generation females at P21. The gene enrichment analysis grouped the differentially expressed genes using GO annotations data. We selected enriched GO annotations using 2-fold enrichment criteria as a threshold and identifying annotations that were involved in brain and behavioral processes. Those annotations were then categorized in upregulated (orange) or downregulated (blue) annotations.

**Figure S3.** *Nr3c1*, *Crh*, *Grin2d*, *Grid2* and *Avp* mRNA expression in the female rat ancestrally (F3 generation) exposed to an EDC mixture or vehicle in the MBH-PoA of infant (P6), prepubertal (P1) and adult (P60) female rats as determined by qPCR (n=6/group). AU = arbitrary units. RNA expression data were normalized by dividing each individual value by the average of the control group at every time point. Bars represent mean  $\pm$  s.e.m. (\*P < 0.05, \*\*P < 0.01, \*\*\*P < 0.001 vs. CTL, Student's t-test). Summary data are reported in Table S5.

**Figure S4.** Abundance of the TrxG-dependent activating marks H3K4me3 and H3K9ac and the PcG-dependent repressive mark H3K27me3 and H3K9me3 at the *Kiss1*, *Esr1*, *Oxt*, *Pomc*, *Cart*, *Nr3c1*, *Crh* and *Grin2d* promoter in the prepubertal MBH-PoA of females EDC and control from the F3 generation, as measured by ChIP (n=6/group). Dotted red lines represent repressive histone modifications while green lines represent activatory histone modifications. All data was normalized to control. Bars represent mean  $\pm$  s.e.m. (\*P < 0.05, \*\*P < 0.01, \*\*\*P < 0.001 vs. CTL, Student's t-test). Summary data are reported in Table S5.

**Figure S5.** Maternal behavior displayed by F0 female rats directly exposed to a mixture of EDC or vehicle. Data shows time spent by dams displaying in-nest behavior (nest building, Arched-back, blancked and passive nursing; and total time spent in-nest) or off-nest behaviors (eating/drinking, self-grooming, being active and total time off-nest) from P2 to P8. Plotted lines represent average of time  $\pm$  s.e.m. Summary data are reported in Table S5.

**Figure S6.** Maternal behavior displayed by F1 female rats exposed *in utero* to a mixture of EDC or vehicle. Data shows time spent by dams displaying in-nest behavior (nest building, Arched-back, blancked and passive nursing; and total time spent in-nest) or off-nest behaviors (eating/drinking, self-grooming, being active and total time off-nest) from P2 to P8. Plotted lines represent average of time  $\pm$  s.e.m. Summary data are reported in Table S5.

**Figure S7.** Maternal behavior displayed by F2 female rats exposed as germ cells to a mixture of EDC or vehicle. Data shows time spent by dams displaying in-nest behavior (nest building, Arched-back, blancked and passive nursing; and total time spent in-nest) or off-nest behaviors (eating/drinking, self-grooming, being active and total time off-nest) from P2 to P8. Plotted lines represent average of time  $\pm$  s.e.m. Summary data are reported in Table S5.

**Figure S8.** Maternal behavior displayed by F3 female rats directly ancestrally exposed to a mixture of EDC or vehicle. Data shows time spent by dams displaying in-nest behavior (nest building, Arched-back, blancked and passive nursing; and total time spent in-nest) or off-nest behaviors (eating/drinking, self-grooming, being active and total time off-nest) from P2 to P8. Plotted lines represent average of time  $\pm$  s.e.m. Summary data are reported in Table S5.

**Figure S9.** Fold enrichment of gene ontology (GO) annotations using David pathway analysis across compared groups (CTL vs EDC) in the MBH-PoA of F1 generation females at P21. The gene enrichment analysis grouped the differentially expressed genes using GO annotations data. We selected enriched GO annotations using 2-fold enrichment criteria as a threshold and identifying annotations that were involved in brain and behavioral processes. Those annotations were then categorized in upregulated (orange) or downregulated (blue) annotations.

**Figure S10.** *Nr3c1* and *Crh* mRNA expression and *Darpp32* and *Drd1* promoter chromatin state in the female rat *in utero* and lactationally (F1 generation) exposed to an EDC mixture or vehicle. (a) Expression of *Nr3c1* and *Crh* mRNA in the MBH-PoA prepubertal (P21) female rats as determined by qPCR (n=6/group). AU = arbitrary units. RNA expression data were normalized by dividing each individual value by the average of the control group at every time point. (b-c) Abundance of the TrxG-dependent activating marks H3K4me3 and H3K9ac and the PcG-dependent repressive mark H3K27me3 and H3K9me3 at the *Darpp32* and *Drd1* promoter in the prepubertal MBH-PoA of females perinatally exposed to a mixture of EDC (F1 generation), as measured by ChIP (n=6/group). Dotted red lines represent repressive histone modifications while green lines represent activatory histone modifications. Bars represent mean  $\pm$  s.e.m. Summary data are reported in Table S5.

**Figure S11.** Abundance of the TrxG-dependent activating marks H3K4me3 (a) and H3K9ac (b) and the PcG-dependent repressive mark H3K27me3 (c) at the *Kiss1*, *Esr1*, *Oxt* and *Th* promoter in the prepubertal (P21) MBH-PoA of the transgenerationally-exposed EDC pups or control raised by either *in utero* EDC exposed dams or control, as measured by ChIP (n=6/group). CC= control pup raised by control dam; EC: control pup raised by *in utero* EDC exposed dam; EE= germ-cell EDC exposed pup raised by *in utero* EDC exposed dam; CE= germ-cell EDC exposed pup raised by control dam. Bars represent mean  $\pm$  s.e.m. (\*P < 0.05, \*\*P < 0.01 vs. CC, †P < 0.05 vs. CE, one-way ANOVA). Summary data are reported in Table S6.

**Table S1.** Primer Sequence.

**Table S2.** List of primary antibodies.

**Table S3.** Report of descriptive and statistical data.

**Table S4.** Report of descriptive data and statistical analysis of crossfostering data.

**Table S5.** Report of descriptive and statistical data from supplementary material.

**Table S6.** Report of descriptive data and statistical analysis of crossfostering data from the supplementary material.
